# 1 Glycogen Synthase Kinase 3 regulates the genesis of the rare 2 displaced ganglion cell retinal subtype

3  
4  
5 Elena Kisseleff<sup>1</sup>, Robin J Vigouroux<sup>3</sup>, Catherine Hottin<sup>1</sup>, Sophie Lourdel<sup>1</sup>, Parth Shah<sup>2</sup>,  
6 Alain Chédotal<sup>3</sup>, Muriel Perron<sup>1\*</sup>, Anand Swaroop<sup>2\*</sup> and Jerome E Roger<sup>1,2\*</sup>

7  
8  
9 <sup>1</sup> Paris-Saclay Institute of Neuroscience, CERTO-Retina France, CNRS, Université  
10 Paris-Saclay, Orsay 91405, France

11 <sup>2</sup> Neurobiology-Neurodegeneration and Repair Laboratory, National Eye Institute,  
12 National Institutes of Health, Bethesda, MD, USA

13 <sup>3</sup> Sorbonne Universités, UPMC Université Paris 06, INSERM, CNRS, Institut de la  
14 Vision, 75012 Paris, France

15  
16 Running Title: **GSK3 negatively controls displaced ganglion cell genesis**

17  
18 \*Corresponding authors:

- 19 – Jerome E Roger. [jerome.roger@universite-paris-saclay.fr](mailto:jerome.roger@universite-paris-saclay.fr)
- 20 – Anand Swaroop. [swaroopa@nei.nih.gov](mailto:swaroopa@nei.nih.gov)
- 21 – Muriel Perron. [muriel.perron@universite-paris-saclay.fr](mailto:muriel.perron@universite-paris-saclay.fr)

## 22 **ABSTRACT**

23  
24 Glycogen Synthase Kinase 3 (GSK) proteins (GSK3 $\alpha$  and GSK3 $\beta$ ) are key mediators  
25 of signaling pathways, with crucial roles in coordinating fundamental biological  
26 processes during neural development. Here we show that the complete loss of GSK3  
27 signaling in mouse retinal progenitors leads to microphthalmia with broad  
28 morphological defects. Both proliferation of retinal progenitors and neuronal  
29 differentiation are impaired and result in enhanced cell death. A single wild-type allele  
30 of either *Gsk3 $\alpha$*  or *Gsk3 $\beta$*  is able to rescue these phenotypes. In this genetic context,  
31 all cell types are present with a functional retina. However, we unexpectedly detect a  
32 large number of cells in the inner nuclear layer expressing retinal ganglion cell (RGC)-  
33 specific markers (called displaced RGCs, dRGCs) when at least one allele of *Gsk3 $\alpha$*  is  
34 expressed. Excess dRGCs lead to increased number of axons projecting into the  
35 ipsilateral medial terminal nucleus, an area of the brain belonging to the non-image-  
36 forming visual circuit and poorly targeted by RGCs in wild-type retina. Transcriptome  
37 analysis and optomotor response assay suggest that at least a subset of dRGCs in  
38 *Gsk3* mutant mice are direction-selective RGCs. Our study thus uncovers a unique  
39 role of GSK3 in controlling the genesis of dRGCs, a rare and poorly characterized  
40 retinal cell type.

41  
42 Key words: Retinal development, Glycogen Synthase Kinase 3, Posttranslational  
43 modifications, Displaced ganglion cells, Cell death, Proliferation

## 45 INTRODUCTION

46 Glycogen Synthase Kinase 3 alpha (GSK3 $\alpha$ ) and beta (GSK3 $\beta$ ) are functionally  
47 redundant serine/threonine kinases encoded by two different genes, sharing 95%  
48 identity in their kinase domain (Doble et al., 2007). GSK3 exists at the crossroads of  
49 multiple signaling pathways and acts as a key molecular switch to mediate their output  
50 and guide distinct cellular processes (Cole, 2012; Doble and Woodgett, 2003;  
51 Espinosa et al., 2003; Jin et al., 2009; Shimizu et al., 2008; Wang and Li, 2006). Among  
52 the signaling pathways regulated by GSK3 kinases, Wnt canonical pathway is the most  
53 well described, with GSK3 $\beta$  inhibition triggering an increase in  $\beta$ -catenin protein levels  
54 and its nuclear translocation to activate target gene expression (Doble and Woodgett,  
55 2003).

56 GSK3 is a key regulator of neural stem/precursor cell proliferation in developing  
57 as well as adult brain (Eom and Jope, 2009; Hur and Zhou, 2010; Kim et al., 2009;  
58 Pachenari et al., 2017). Conditional deletion and gain of function experiments indicate  
59 that GSK3 promotes neuronal differentiation (Hur and Zhou, 2010; Kim et al., 2009).  
60 GSK3 exerts its effects through phosphorylation of key proteins involved in neural  
61 development, including proneural factors such as Neurogenin 2 and NeuroD (Li et al.,  
62 2012; Moore et al., 2002). In addition, GSK3 fine-tunes the balance between cell death  
63 and survival, and its altered function is associated with neurodegenerative pathologies  
64 including Alzheimer's disease, bipolar disorders, and Parkinson's disease (Golpich et  
65 al., 2015; Jacobs et al., 2012; Kremer, 2011; Li et al., 2014; Maurer et al., 2014; Medina  
66 et al., 2011).

67 GSK3 kinases are widely expressed in the developing retina (Pérezleón et al.,  
68 2013). GSK3-dependent phosphorylation is shown to control the timing of proneural  
69 factor activity and thereby regulate retinal cell fate determination. For instance,  
70 inhibition of GSK3 signaling in the developing *Xenopus* retina leads to increase in  
71 early-born cell types at the expense of late-born cells (Marcus et al., 1998; Moore et  
72 al., 2002).

73 To elucidate GSK3 function in mammalian retina development, we generated  
74 conditional loss-of-function alleles of *Gsk3 $\alpha$*  and *Gsk3 $\beta$*  in retinal progenitor cells. We  
75 show that complete loss of both GSK3 kinases severely impacts retinal morphology  
76 with microphthalmia phenotype, which could be completely rescued with the  
77 expression of just one *Gsk3 $\alpha$*  or *Gsk3 $\beta$*  wild-type allele. We also noted the presence  
78 of a large number of displaced retinal ganglion cells (dRGCs) in the inner nuclear layer  
79 in the absence of either *Gsk3 $\alpha$*  or *Gsk3 $\beta$* . In normal conditions, this is a rare retinal cell  
80 subtype, poorly characterized so far. Anterograde labeling of the axonal ganglion cell  
81 projections into the brain of *Gsk3* mutant mice, allowed us to further support their  
82 dRGCs identity. Our study thus identifies GSK3 as a possible determinant of dRGC  
83 genesis. We also provide transcriptomic data and visual tests suggesting that at least  
84 a subset of these supernumerary dRGCs in *Gsk3* mutant retinas are direction-selective  
85 RGCs.

86

## 87 RESULTS

## 88 **Retinal progenitor-specific deletion of both *Gsk3α* and *Gsk3β* results in** 89 **microphthalmia**

90 We crossed the floxed *Gsk3α<sup>ff/ff</sup>β<sup>ff/ff</sup>* mice with *α-Cre* (*αPax6-Cre*) line to generate  
91 *Gsk3α<sup>ff/ff</sup>β<sup>ff/ff</sup>;α-Cre* mice in which *Gsk3* deletion occurs only in retinal progenitors as early  
92 as E10.5 (Marquardt et al., 2001). We first validated our model by assessing the  
93 efficacy of *Gsk3α* and *Gsk3β* deletion at E12.5 (Figure 1A). Immunohistochemistry  
94 (IHC) using an antibody recognizing both GSK3 proteins showed ubiquitous  
95 expression in control retinas (Figure 1A). Both *Gsk3* genes were efficiently deleted in  
96 the peripheral retina of *Gsk3α<sup>ff/ff</sup>β<sup>ff/ff</sup>;α-Cre* mice, but their expression in the central retina  
97 remained preserved consistent with the previously described *α-Cre* expression pattern  
98 (Marquardt et al., 2001).

99 Hematoxylin and Eosin (H&E) staining revealed major morphological defects  
100 with profound retinal disorganization, including the loss of radial arrangement as well  
101 as folds and aggregates of retinal progenitor cells (RPCs), in *Gsk3α<sup>ff/ff</sup>β<sup>ff/ff</sup>;α-Cre* retina  
102 as early as E12.5 (Figure 1B). In addition, blood was detected inside the retinal  
103 neuroblastic layer. Structure of the retina worsened rapidly during development  
104 although the central part remained unperturbed, consistent with continued *Gsk3*  
105 expression in this region. At and after E14.5, the retina was largely reduced whereas  
106 the eye size itself was comparable to littermate controls (Figure 1B). A large quantity  
107 of blood accumulated inside the eyeball at P2. Finally, growth of the eyeball was  
108 severely reduced leading to microphthalmia in the adult (data not shown).

109 Because of a severe phenotype in the adult, we focused our histological  
110 analyses to early retinal development. We first investigated subcellular localization of  
111  $\beta$ -catenin, an established GSK3 target that activates the canonical Wnt pathway (Doble  
112 and Woodgett, 2003). In control retina,  $\beta$ -catenin expression was mostly cytoplasmic  
113 (Figure 1C). Upon *Gsk3α* and *Gsk3β* deletion,  $\beta$ -catenin was still expressed in the  
114 cytoplasm but translocated to the nucleus in some cells as early as E12.5.  
115 *Gsk3α<sup>ff/ff</sup>β<sup>ff/ff</sup>;α-Cre* retina at E14.5 revealed a clearly defined boundary between the Cre-  
116 negative region (GSK3-positive cells) at the center and the Cre-positive region (GSK3-  
117 negative cells) at the periphery with nuclear translocation and large accumulation of  $\beta$ -  
118 catenin in the nucleus (Figure 1C). Such an expression pattern is consistent with strong  
119 activation of canonical Wnt pathway in the absence of both *Gsk3α* and *Gsk3β*. These  
120 findings demonstrate that GSK3 regulates Wnt signaling in RPCs and is essential for  
121 proper retinal development.

122

## 123 **Lack of both *Gsk3α* and *Gsk3β* in RPCs leads to cell cycle aberrations and retinal** 124 **progenitor gene deregulation**

125 We focused our analysis on early retinal development (E12.5 and E14.5) in  
126 *Gsk3α<sup>ff/ff</sup>β<sup>ff/ff</sup>;α-Cre* mice to elucidate the cause of microphthalmia phenotype. To  
127 investigate whether proliferation was altered in *Gsk3α<sup>ff/ff</sup>β<sup>ff/ff</sup>;α-Cre* mouse retina, a single  
128 dose of EdU (to label RPCs in the S-phase) was injected 16 hours prior to harvesting  
129 embryos at E12.5 and E14.5. As predicted, EdU-positive cells increased significantly  
130 from E12.5 to E14.5 in control retina (Figure 2A, B); yet, no change was detected in  
131 *Gsk3α<sup>ff/ff</sup>β<sup>ff/ff</sup>;α-Cre* retina and reduction in RPCs in S-phase was evident at E14.5

132 compared to controls, suggesting proliferation defects. We further examined cell  
133 proliferation by labeling late-G2/M-phase retinal progenitors using phospho-histone 3  
134 (pH3) antibody. In control, strongly labeled pH3-positive cells were positioned in the  
135 apical surface of the retina where mitosis occurs (M-phase cells). Cells with less  
136 intense labeling, presumably late-G2 cells, were present in the outer part of the retinal  
137 neuroblastic layer. In *Gsk3 $\alpha^{ff}\beta^{ff};\alpha$ -Cre* retina, pH3-positive cells located at the  
138 periphery were positioned distant from the apical side at both stages (Figure 2A).  
139 Moreover, their number at the periphery was abnormal compared to controls, being  
140 increased at E12.5 and decreased at E14.5 (Figure 2B). Double pH3- and EdU-positive  
141 cells were increased in *Gsk3 $\alpha^{ff}\beta^{ff};\alpha$ -Cre* retinas compared to controls, at both stages,  
142 indicating aberrant cell cycle kinetics (Figure 2B). To investigate the consequence of  
143 such cell proliferation defects on the pool of RPCs in the absence of GSK3, we  
144 analyzed the expression of Hes1, a retinal progenitor marker (Wall et al., 2009). At  
145 E12.5 and E14.5, anti-Hes1 antibody labeled all RPCs throughout control retina with  
146 the exception of the basal side where differentiating ganglion cells are located (Figure  
147 S1). In *Gsk3 $\alpha^{ff}\beta^{ff};\alpha$ -Cre* retinas, Hes1 expression was similar to controls at E12.5  
148 indicating the maintenance of RPC pools (Figure S1A). However, by E14.5, Hes1  
149 positive cells were sparser at the periphery where *Gsk3* expression was absent (Figure  
150 S1B). In the same area lacking *Gsk3* expression, other progenitor markers, such as  
151 Pax6 and Sox2, were similarly decreased in *Gsk3 $\alpha^{ff}\beta^{ff};\alpha$ -Cre* retina compared to  
152 controls (data not shown). Thus, our results show that GSK3 kinases are required for  
153 retinal progenitor proliferation and the maintenance of the pool of RPCs.

154

### 155 **Loss of *Gsk3 $\alpha$* and *Gsk3 $\beta$* impairs retinal progenitor differentiation leading to** 156 **cell death**

157 To examine whether neuronal differentiation is impacted by the absence of  
158 GSK3, we performed IHC using two neuronal markers, Doublecortin (Dcx) and Brn3a,  
159 to label newly generated neurons and RGCs, respectively (Figure 3). At E12.5 and  
160 E14.5, Dcx- and Brn3a-positive cells were localized in the inner part of the neuroblastic  
161 layer of the control retina where retinal differentiation occurs first. In contrast, neuronal  
162 differentiation was completely abolished at both stages in *Gsk3 $\alpha^{ff}\beta^{ff};\alpha$ -Cre* retina,  
163 except in the most central part corresponding to the area that does not express Cre  
164 recombinase. The absence of retinal differentiation and decreased expression of  
165 proliferation markers prompted us to investigate whether the loss of *Gsk3* in RPCs  
166 could trigger cell death. We indeed detected a significant increase in the number of  
167 TUNEL-positive cells in *Gsk3 $\alpha^{ff}\beta^{ff};\alpha$ -Cre* retina at both embryonic stages (Figure S2).  
168 Thus, microphthalmia observed in the absence of both *Gsk3 $\alpha$*  and *Gsk3 $\beta$*  is likely due  
169 to a succession of developmental defects ranging from impaired proliferation and  
170 differentiation of RPCs to increased cell death.

171

### 172 **Multiple allelic combinations revealed functional redundancy of *Gsk3 $\alpha$* and** 173 ***Gsk3 $\beta$* in retinal development**

174 Severe deleterious effect of the loss of both *Gsk3 $\alpha$*  and *Gsk3 $\beta$*  in RPCs in early  
175 development precludes the analysis of late retinal histogenesis. To circumvent this, we



176 generated animals with different combinations of *Gsk3* deletion (loss of only one *Gsk3*  
177 gene: *Gsk3* $\alpha^{ff/\beta^{+/+}};\alpha-Cre$  or *Gsk3* $\alpha^{+/+\beta^{ff}};\alpha-Cre$ , or  $\frac{3}{4}$  deletion: *Gsk3* $\alpha^{ff/\beta^{ff}};\alpha-Cre$  or  
178 *Gsk3* $\alpha^{ff/\beta^{ff}};\alpha-Cre$ ). Immunoblot analysis using anti-GSK3 antibody (recognizing both  
179 proteins) in 2-month-old animals with different combinations of *Gsk3* $\alpha$  and *Gsk3* $\beta$   
180 floxed alleles demonstrated the efficacy of *Gsk3* $\alpha$  and *Gsk3* $\beta$  deletion (Figure S3A).  
181 IHC analysis using anti-GSK3 $\beta$  showed ubiquitous expression of *Gsk3* $\beta$  in adult  
182 control retina and its complete loss in *Gsk3* $\alpha^{ff/\beta^{ff}};\alpha-Cre$  retina (Figure S3B). At 2-  
183 months, retinal histology revealed the correct laminated architecture with normal  
184 photoreceptors and interneurons when even one allele of *Gsk3* $\alpha$  (Figure S3C, D) or  
185 *Gsk3* $\beta$  (data not shown) was present. Photopic and scotopic electroretinogram (ERG)  
186 recordings, corresponding to cone and rod function respectively, did not show any  
187 significant difference between *Gsk3* $\alpha^{ff/\beta^{ff}};\alpha-Cre$  and control retina (Figure S3E, S3F).  
188 These results were similar in mice carrying any combination of *Gsk3* deletion (data not  
189 shown). We therefore conclude that a single allele of wild-type *Gsk3* $\alpha$  or *Gsk3* $\beta$  is  
190 sufficient to rescue obvious structural and functional defects in the complete absence  
191 of GSK3 signaling.

192

### 193 **Loss of either *Gsk3* $\alpha$ or *Gsk3* $\beta$ in RPCs leads to increased number of displaced** 194 **retinal ganglion cells**

195 Even though a single allele of either *Gsk3* $\alpha$  or *Gsk3* $\beta$  permitted normal retinal  
196 development (Figure S3), we observed a striking increase in the number of RGCs, as  
197 indicated by Brn3a-positive cells, in the inner nuclear layer (INL) of *Gsk3* $\alpha^{ff/\beta^{ff}};\alpha-Cre$   
198 retina compared to controls (Figure 4A). Brn3a-positive cells in the INL have been  
199 described as displaced retinal ganglion cells (dRGCs), a rare cell type in the  
200 mammalian retina (Galli-Resta and Ensini, 1996; Young, 1984). All Brn3a-positive cells  
201 in the INL of *Gsk3* $\alpha^{ff/\beta^{ff}};\alpha-Cre$  retina also expressed NF68 that labels cell bodies and  
202 axons of RGCs (Figure 4A). Increased dRGCs were observed in retinas carrying any  
203 combination of *Gsk3* deletions tested (*Gsk3* $\alpha^{ff/\beta^{+/+}}$ , *Gsk3* $\alpha^{+/+\beta^{ff}}$ , *Gsk3* $\alpha^{ff/\beta^{ff}}$  or  
204 *Gsk3* $\alpha^{ff/\beta^{ff}}$ ), with the highest number detected in *Gsk3* $\alpha^{ff/\beta^{ff}};\alpha-Cre$  mice compared to  
205 controls (10-fold increase) (Figure 4B). Interestingly, increase in dRGCs number is not  
206 associated with reduced number of RGCs in the GCL, referred to as orthotopic RGCs  
207 (oRGCs) (Figure 4B). To validate that these Brn3a-positive cells in the INL were indeed  
208 RGCs with axonal projections included in the optic nerve, we performed retrograde  
209 labeling with Rhodamine-Dextran applied onto the optic nerve of *Gsk3* $\alpha^{ff/\beta^{ff}};\alpha-Cre$   
210 mice. Subsequent 3D reconstructions on flat mount retinas revealed the presence of  
211 numerous fluorescent cell bodies located in the INL compared to controls,  
212 demonstrating that axons of dRGCs indeed reached the optic nerve (Figure 4C). Thus,  
213 Brn3a-positive cells located in the INL of *Gsk3* $\alpha^{ff/\beta^{ff}};\alpha-Cre$  retinas are indeed RGCs.

214 Due to their low number in control retina (around 2%), dRGCs have been poorly  
215 characterized with very few markers identified, such as Brn3a (Nadal-Nicolás et al.,  
216 2012; Nadal-Nicolás et al., 2014). Immunostaining on sections and flat mount retinas  
217 with additional RGC marker antibodies revealed that dRGCs in *Gsk3* $\alpha^{ff/\beta^{ff}};\alpha-Cre$  retina  
218 were also positive for Rbpms (Rodriguez et al., 2014) confirming their increased  
219 number in the INL compared to controls (Figure 4D, E). Similar results were observed

220 with Islet1 labeling (Figure S4) (Bejarano-Escobar et al., 2015). Finally, Brn3a-positive  
221 dRGCs did not express markers of other INL neurons such as Choline-  
222 Acetyltransferase (CHAT, amacrine cells), Calretinin (amacrine cells), or Calbindin  
223 (horizontal cells) further confirming their RGC identity (data not shown).

224 To test whether dRGCs in *Gsk3* mutant mice were produced during the same  
225 developmental time window as oRGCs, we performed pulse chase experiments by  
226 injecting EdU at E12.5, at the peak of RGC birth. Retinal sections from one-month-old  
227 animals were then immunolabelled using anti-Brn3a antibody (Figure 5A). In control  
228 and *Gsk3 $\alpha^{fl/+}\beta^{fl/fl};\alpha-Cre$*  retina, we identified 40-50% of RGCs that were Brn3a/EdU-  
229 positive in all layers examined (GCL and INL), indicating that both dRGCs and oRGCs  
230 were born around the same time (Figure 5B). We next examined whether dRGCs are  
231 usually overproduced during normal retinal development and eliminated later on. In  
232 this context, increased number of dRGCs in *Gsk3 $\alpha^{fl/+}\beta^{fl/fl};\alpha-Cre$*  retinas could result from  
233 a defect in dRGC riddance occurring during the first two postnatal weeks, a period of  
234 developmental cell death in the retina (Young, 1984). At P0, the number of Brn3a-  
235 positive oRGCs was similar between littermate control and *Gsk3 $\alpha^{fl/+}\beta^{fl/fl};\alpha-Cre$*  retina  
236 (Figure 5C and D). In contrast, the proportion of Brn3a-positive cells located in the  
237 inner part of neuroblastic layer corresponding presumably to dRGCs was much lower  
238 in control retinas ( $6\pm 0.1\%$ ) compared to *Gsk3 $\alpha^{fl/+}\beta^{fl/fl};\alpha-Cre$*  retinas ( $30\pm 1.4\%$ ). Thus,  
239 dRGCs are not overproduced and eliminated postnatally in control retina. Our results  
240 demonstrate that dRGCs are generated during early waves of retinogenesis in  
241 *Gsk3 $\alpha^{fl/+}\beta^{fl/fl};\alpha-Cre$*  retina and strongly suggest that GSK3 kinases play a role in  
242 restricting their number during normal retinal development.

### 243 **dRGCs produced in the absence of either *Gsk3 $\alpha$* or *Gsk3 $\beta$* project to accessory** 244 **visual system circuitry**

245 Previous studies in birds and reptiles have reported that dRGCs could be  
246 responsible for optokinetic nystagmus, as they mostly project to the accessory optic  
247 nuclei (AOS) (Cook and Podugolnikova, 2001), which is critical for non-image forming  
248 circuit and image stabilization (Simpson, 1984). To test whether dRGCs in *Gsk3*  
249 mutants project into specific visual nuclei in the brain, including the AOS, we traced  
250 the total pool of RGCs, including dRGCs, with Cholera Toxin beta subunit (CTB). Bi-  
251 lateral injection of CTB, coupled to either an alexa-555 or -647 followed by 3D imaging,  
252 allowed us to trace both ipsi- and contra-lateral projecting axons. We first confirmed  
253 that CTB injections indeed marked the dRGCs based on flat mounts of retinas after  
254 Brn3a immunolabelling (data not shown). To visualize the entire visual projection  
255 network, we carried out whole-brain clearing using iDISCO+ followed by light-sheet  
256 fluorescent imaging and 3D reconstruction (Figure 6A). Complete loss of *Gsk3 $\beta$*   
257 displayed a specific increase in ipsilateral projecting RGCs specifically in one of the  
258 three nuclei composing the AOS, the Medial Terminal Nucleus (MTN) (Simpson,  
259 1984). This terminal nucleus is the main component of the AOS reacting best to either  
260 upward or downward movement and mediates the optokinetic nystagmus critical for  
261 image stabilization (Yonehara et al., 2009). Calculation of the signal intensity ratio  
262 between the ipsilateral and contralateral MTN demonstrated a significant increase of  
263 RGC projections into the ipsilateral MTN in retinas with *Gsk3 $\beta$*  deletion (Figure 6B).

264 This result strongly suggests that excess dRGCs might participate to the non-image  
265 forming circuit.

### 266 **Whole transcriptome analysis suggests that dRGCs in GSK3 mutant retinas are** 267 **direction-selective ganglion cells.**

268 We next performed transcriptome analysis using RNA-sequencing in order to  
269 identify molecular changes in adult *Gsk3 $\alpha^{f/+}$  $\beta^{f/f}$ ; $\alpha$ -Cre* retina and to better characterize  
270 dRGCs. Retinas from *Gsk3 $\alpha^{f/+}$  $\beta^{f/f}$*  mice were used as controls. Gene level analysis  
271 revealed 111 differentially expressed genes (DEGs) using filtering criteria of Fold  
272 Change (FC) = 1.5 with a False Discovery rate (FDR) cutoff of  $\leq 0.05$  and a minimum  
273 mean expression value of one FPKM (fragments per kilobase of exon per million reads  
274 mapped) in at least one of the two experimental groups (Figure 7A and Figure S5).  
275 Pathway analysis of DEGs revealed several statistically significant overrepresented  
276 pathways (Figure S6). Biological processes and molecular functions pathways  
277 included 48 DEGs; of these, 33 genes were expressed in RGCs based on published  
278 whole transcriptomic data from purified RGCs (for a total 69 RGC-expressed genes  
279 among the 111 DEGs) (labeled with stars in Figure 7B) (Sajgo et al., 2017). Dominance  
280 of RGC-expressed genes in our dataset is consistent with the high number of dRGCs  
281 observed in *Gsk3 $\alpha^{f/+}$  $\beta^{f/f}$ ; $\alpha$ -Cre* retina.

282 Among interesting candidates dysregulated in the biological processes and  
283 molecular function pathways (Figure 7B and S6), we identified *Chrna2*, *Chrna5*,  
284 *Chrna7*, and *Chrnab4*. With the exception of *Chrna2*, all of these are reported in purified  
285 ganglion cell transcriptomic data (Sajgo et al., 2017). RT-qPCR analysis validated  
286 upregulation of *Chrna5*, as well as the downregulation of *Chrnab4* (Figure 7C). For  
287 *Chrna7*, we could only find a trend toward the increase although not significant. We  
288 hypothesize that upregulation of *Chrna5*, and potentially that of *Chrna7*, results from  
289 the increase in dRGCs in *Gsk3 $\alpha^{f/+}$  $\beta^{f/f}$ ; $\alpha$ -Cre* retina. Another gene *Cartpt*, encoding  
290 preprotein CART (Cocaine- And Amphetamine-Regulated Transcript Protein) that was  
291 upregulated in *Gsk3 $\alpha^{f/+}$  $\beta^{f/f}$ ; $\alpha$ -Cre* retina was validated by RT-qPCR (Figure 7C). *Cartpt*  
292 is specifically expressed in direction-selective RGCs (DS-RGCs) (Kay et al., 2011;  
293 Rouso et al., 2016), suggesting that dRGCs (or at least a subset) in *Gsk3 $\alpha^{f/+}$  $\beta^{f/f}$ ; $\alpha$ -Cre*  
294 retina might be DS-RGCs. In support with this hypothesis, we found some dRGCs in  
295 *Gsk3 $\alpha^{f/+}$  $\beta^{f/f}$ ; $\alpha$ -Cre* and littermate control retina positive for the transcription factor *Tbr2*,  
296 described as essential for RGC specification participating in non-image-forming visual  
297 circuits (Figure 7D) (Sweeney et al., 2014, 2019). A small subset of dRGCs also  
298 expressed *Foxp2*, a transcription factor involved in DS-RGC differentiation in mice  
299 (Figure 7D) (Rouso et al., 2016; Sato et al., 2017). These two factors were expressed  
300 in a mutually exclusive way in Rpbms-positive dRGCs, suggesting that dRGCs in  
301 *Gsk3 $\alpha^{f/+}$  $\beta^{f/f}$ ; $\alpha$ -Cre* might encompass several subtypes.

302

### 303 **Optomotor response is impaired in GSK3 mutant**

304 Given that DS-RGCs are reported to drive the optomotor response (OMR) by  
305 projecting mainly into the contralateral AOS (Simpson, 1984; Yonehara et al., 2009),  
306 we tested the OMR of *Gsk3 $\alpha^{f/+}$  $\beta^{f/f}$ ; $\alpha$ -Cre* mice. The OMR indices ( $T_{\text{correct}} /$   
307  $T_{\text{incorrect}}$ ) were calculated from three trials at contrast 1 and 0.5 (Figure 7E). At

308 100% contrast, the OMR indices were significantly reduced in *Gsk3α<sup>f/+</sup>β<sup>ff</sup>;α-Cre* mice  
309 compared to controls at 0.05, 0.15 and 0.25 cycles per degree (cpd). The maximum  
310 OMR index was observed at 0.15 cpd in controls whereas it reached its maximum at  
311 0.1 in *Gsk3α<sup>f/+</sup>β<sup>ff</sup>;α-Cre* mice. At 50% contrast, the OMR indices were also significantly  
312 reduced in *Gsk3α<sup>f/+</sup>β<sup>ff</sup>;α-Cre* mice compared to controls but to a larger extent between  
313 0.05 and 0.3 cpd. The maximum OMR index was observed at 0.15 cpd in both controls  
314 and *Gsk3α<sup>f/+</sup>β<sup>ff</sup>;α-Cre* mice. Altogether, these results demonstrate an impaired OMR  
315 in *Gsk3α<sup>f/+</sup>β<sup>ff</sup>;α-Cre* mice. These data, in support with our transcriptomic and axonal  
316 projections analyses, suggest that at least a subset of dRGCs expressing only one  
317 allele of *Gsk3α* are DS-RGCs.  
318

## 319 DISCUSSION

320 In this study, we report that complete loss of GSK3 in retinal progenitors leads  
321 to microphthalmia in adult mice resulting from a successive chain of catastrophic  
322 molecular events causing severe morphological defects with progressive death of the  
323 pool of proliferative retinal progenitors and lack of neuronal differentiation. Such a  
324 severe phenotype was not observed anymore when only one *Gsk3α* or *Gsk3β* allele  
325 was expressed, confirming the functional redundancy of these two genes. Our results  
326 suggest that the kinase GSK3 is the first discovered dRGCs determinant during retinal  
327 histogenesis. We indeed found that mouse retinas with only one allele of *Gsk3* exhibit  
328 an excessive number of dRGCs. The concomitant large increase of axonal projections  
329 to the ipsilateral MTN, our RNA-Seq data and optomotor response tests, led us to  
330 propose that these dRGCs are involved in the detection of image motion direction.

331 We reported that complete loss of GSK3 activity in retinal progenitors leads a  
332 successive chain of catastrophic molecular events causing severe morphological  
333 defects with progressive death of the pool of proliferative retinal progenitors and lack  
334 of neuronal differentiation. A lack of cell differentiation was also described in the  
335 developing brain of *Gsk3* mutant mice (Kim et al., 2009). Surprisingly however, we  
336 demonstrate that the absence of GSK3 impairs the maintenance of the pool of retinal  
337 progenitors and their survival, leading subsequently to microphthalmia in adults. Our  
338 results are in striking contrast with the “big head phenotype” due to a large expansion  
339 of the pool of neural progenitors by hyperproliferation and the absence of cell death at  
340 early stages observed in *Gsk3α<sup>-/-</sup>;Gsk3β<sup>ff</sup>; Nestin-Cre* embryos (Kim et al., 2009).  
341 Retinal progenitors might be more prompt to cell death if they encounter proliferative  
342 defects compared to brain neural progenitors. GSK3 kinases are established negative  
343 regulators of the Wnt canonical pathway (Doble and Woodgett, 2003). As such, we  
344 found that lack of GSK3 leads to increased amount of β-catenin nuclear translocation.  
345 Interestingly, the effect of *Gsk3* loss of function in the retina mimics the effect of β-  
346 catenin gain of function. Indeed, constitutive retinal activation of β-catenin does not  
347 elicit an hyperproliferation of retinal cells, as one could have expected from Wnt  
348 pathway activation but instead, it decreases cell proliferation and neural differentiation,  
349 resulting in a small eye phenotype (Fu et al., 2006; Ouchi et al., 2011). Besides, β-  
350 catenin has been recognized as a key regulator of cell adhesion (Ouchi et al., 2011).



351 The lamination defects observed in *Gsk3* knockout mice may thus also result from  
352 altered cell adhesion due to  $\beta$ -catenin activation.

353 In pigmented wild-type mouse retina, dRGCs in the INL are a very rare and  
354 poorly-described type of cells representing only 2% of RGCs (Balkema and Dräger,  
355 1990; Doi et al., 1994; Dräger and Olsen, 1980; Nadal-Nicolás et al., 2014). It is  
356 therefore striking that dRGC number increases up to 20% when a single copy of *Gsk3 $\alpha$*   
357 is present in retinal progenitors. To our knowledge, such a high number of dRGCs has  
358 never been reported in a transgenic/mutant animal. A previous study hypothesized that  
359 dRGCs are misplaced in the INL due to an ontogenic aberration rather than  
360 representing an independent class of RGCs (Buhl and Dann, 1988; Doi et al., 1994).  
361 Indeed, differential cell adhesion plays a key role in sorting and migration of retinal  
362 cells in their appropriate layers, especially for RGCs. One can therefore hypothesize  
363 that enhanced dRGCs in mice with a single copy of *Gsk3* is the consequence of  
364 increased aberration events. This hypothesis could be supported by our RNA-Seq data  
365 showing the upregulation of genes coding for collagen subunits (*Col18a1*, *Col4a3*,  
366 *Col9a1*, *Col9a2*) and extracellular matrix proteins in *Gsk3 $\alpha$ <sup>fl/+</sup> $\beta$ <sup>fl/fl</sup>;  $\alpha$ -Cre retina, which  
367 could favor migration defects. Noticeably, if it were the case, the increase in dRGCs  
368 should be accompanied by a decrease in oRGCs. However, we found that the number  
369 of oRGC in the GCL is unaltered, strongly suggesting that RGCs in the INL of mice  
370 with a single copy of *Gsk3* represent a specific subtype of RGCs. In support with this,  
371 topographic and quantitative analysis of RGCs in albinos and pigmented rats indicate  
372 that dRGCs are not misplaced by ontogenic mistakes but indeed represent a specific  
373 subpopulation of RGCs (Nadal-Nicolás et al., 2014). GSK3 $\beta$  is involved in neural cell  
374 fate decision by controlling the timing of the activity of bHLH transcription factors, such  
375 as NeuroD or Neurog2 (Li et al., 2012; Moore et al., 2002). If dRGCs are not produced  
376 following ontogenic aberrations but are instead determined by a proper genetic  
377 program, it would be interesting to identify transcription factors involved and seek for  
378 any regulation by GSK3 kinases.*

379 In reptiles, amphibians and birds, only dRGCs project into the MTN, whereas in  
380 mammals only oRGCs have been reported as projecting into the MTN (Fite et al., 1981;  
381 Krause et al., 2014). Our results obtained from anterograde labeling clearly  
382 demonstrated a large increase in ipsilateral MTN projections in absence of *Gsk3 $\beta$* ,  
383 whereas it was absent or very dim in control animals. Although this strongly suggests  
384 that excess dRGCs in mutant mice are causing this phenotype, we cannot exclude the  
385 possibility that mutant oRGCs also participate to these ipsilateral MTN projections.  
386 However, contralateral projections did not seem to be affected. We can speculate that  
387 the low number of ipsilateral MTN projections in the control condition reflects the low  
388 number of dRGCs present in the WT retina and could therefore explain that such result  
389 had not been described so far. Altogether, our results strongly suggest that dRGCs  
390 may primarily project into the ipsilateral MTN. In mice, it has been shown by retrograde  
391 labeling from the superior colliculus (SC), which receive large amount of RGC  
392 projections, that dRGCs/oRGCs project to one or both SCs (Karten et al., 1977).  
393 Although challenging, similar experiments, *i.e.* fluorescent dye injection into the  
394 ipsilateral MTN, may allow to discriminate whether the increased signal in absence of



395 *Gsk3 $\beta$*  originates only from dRGCs and whether these cells also project into this area  
396 in WT retina. In regards to our results, it is still unclear whether GSK3 function is to  
397 limit the number of dRGCs and actively regulates their correct projection to the  
398 contralateral MTN or if GSK3 function is limited to the tight control of dRGC number,  
399 which project thereafter to the ipsilateral MTN on a GSK3-independent manner.

400 Given the very low percentage of dRGCs in the control retina, their function is  
401 poorly studied in mammals. In contrast, dRGC function, projections and topography  
402 have been extensively investigated in bird and reptile retina (Mouritsen et al., 2004). In  
403 birds, cryptochrome-expressing dRGCs are used as a magnetic compass for  
404 orientation (Nießner et al., 2016). In European Robin birds, *Erithacus rubecula*, a low  
405 number of dRGCs have been identified but specifically express Cryptochrome 1b only  
406 during nocturnal migration period (Nießner et al., 2016). In rodents, retrograde labeling  
407 from the optic nerve led to the identification of 16 classes of dRGCs based on their  
408 ramification levels of their dendrites as well as the dendritic field size (Pang and Wu,  
409 2011). Based on dRGC dendrite projections into the IPL, it has been proposed that  
410 most dRGCs in WT retina are functionally more involved in retinal OFF light pathways  
411 (Pang and Wu, 2011). Similar methods applied to *Gsk3 $\alpha^{fl/+}$  $\beta^{fl/fl}$ ; $\alpha$ -Cre* retina should shed  
412 more light on dRGC function and establish whether all the different classes are present.

413 As part of the AOS, the MTN receives afferent signal from the eye and sends  
414 efferent signal to motor neurons controlling the position of the eye. As such, optokinetic  
415 reflex relies on direction specific retinal projections to the AOS. Neurons of the dorsal  
416 terminal nucleus (DTN) codes for horizontal stimulus whereas neurons of the MTN  
417 codes for vertical stimulus (Giolli et al., 2006; Yonehara et al., 2009). Therefore, the  
418 direction of image motion relies on DS-RGCs in the retina. The alteration the OMR in  
419 *Gsk3 $\alpha^{fl/+}$  $\beta^{fl/fl}$ ; $\alpha$ -Cre* mice, support the hypothesis that some of the supernumerary  
420 dRGCs are indeed related to motion detection. Although the number of dRGCs was  
421 drastically increased, the OMR was not increased but at the contrary reduced. Such  
422 result might be caused by the higher number of projections to the ipsilateral side  
423 instead of the contralateral one, leading to an alteration of the neuronal circuit  
424 regulating the OMR (Simpson, 1984; Yonehara et al., 2009). We also identified in  
425 *Gsk3 $\alpha^{fl/+}$  $\beta^{fl/fl}$ ; $\alpha$ -Cre* and control retinas a small subset of dRGCs positive for the  
426 transcription factors *Tbr2* and *Foxp2*, markers for non-image-forming RGCs and DS-  
427 RGCs respectively (Nadal-Nicolás et al., 2014). Together with our transcriptomic data  
428 (upregulation of genes such as *Cartpt* (expressed in DS-RGCs)), these results strongly  
429 suggest that the large number of dRGCs in *Gsk3 $\alpha^{fl/+}$  $\beta^{fl/fl}$ ; $\alpha$ -Cre* retina might indeed be  
430 DS-RGCs projecting into the MTN. It has been recently proposed that dRGCs might  
431 be also involved in predator detection by integrating overhead visual information  
432 (Nadal-Nicolás et al., 2014). Using suitable and complementary visual tests, our  
433 genetic model with an excess of dRGCs could be highly valuable to complete the  
434 functional identification of the dRGCs in vision.

435 Overall, our results demonstrate the critical role of GSK3 in tightly regulating the  
436 number of a rare type of dRGCs, poorly described yet. Therefore, *Gsk3* mutant mice,  
437 encompassing a large number of dRGCs in their retina, offer a unique and powerful  
438 model system to further study the embryonic origin, synaptic connections and visual  
439 function of dRGCs in mammals.

440

## 441 **MATERIALS AND METHODS**

### 442 **Animals and tissue collection**

443 All animal experiments have been carried out in accordance with the European  
444 Communities Council Directive of 22 September 2010 (2010/63/EEC), European  
445 Union guidelines effective and with the Association for Research in Vision and  
446 Ophthalmology statement for the use of animals in ophthalmic and visual Research.  
447 All animal care and experimentation were also conducted in accordance with  
448 guidelines, under the license APAFIS#1018-2016072611404304 by the Institutional  
449 animal care committee n°059 in France and by Animal Care and Use Committee at the  
450 National Institutes of Health (ASP#650). *Gsk3 $\alpha$*  and *Gsk3 $\beta$*  floxed mice were  
451 generously provided by Dr. Jim Woodgett (University of Toronto, Canada). Floxed  
452 *Gsk3* mice were mated with those carrying the retina-specific regulatory element of  
453 murine *Pax6* driving the expression of the Cre recombinase ( *$\alpha$ -Cre*) in retinal  
454 progenitors as early as E10.5 generously provided by Peter Gruss (Marquardt et al.,  
455 2001). Mice from either sex were used for experimental procedures. All mouse  
456 genotyping was performed as described (Roger et al., 2010).

457

### 458 **Hematoxylin & eosin (H&E) staining, and immunostaining**

459 Methacrylate sections were used for H&E staining as previously described (Roger et  
460 al., 2012). For IHC on frozen sections, enucleated eyeballs were fixed at the required  
461 stage in 4% PFA for 60 min on ice and incubated in an increasing concentration of  
462 sucrose (10%, 20% and 30%), then embedded in OCT. Embedded eyeballs were  
463 serially cut to 12  $\mu$ m sections using a cryostat. For embryonic stages, pregnant females  
464 were euthanized and whole heads of pups were harvested in paraffin. IHC was  
465 performed as described (Hamon et al., 2019). Primary and secondary antibodies are  
466 listed in Supplementary Table 1. Sections were counterstained with 1:1000 4',6-  
467 diamidino-2-phenylindole (DAPI) (1 mg/mL, Thermo Scientific).

468

### 469 **EdU labeling and TUNEL assay**

470 For EdU labelling, females were injected intraperitoneally with 10 mM of 5-ethynyl-20-  
471 deoxyuridine (EdU) (Life Technology). EdU incorporation was detected on paraffin  
472 sections or frozen sections using the Click-iT EdU Imaging Kit following manufacturer's  
473 recommendations (Life Technology). Apoptosis was detected by terminal  
474 deoxynucleotidyl transferase-mediated biotinylated UTP nick end labeling (TUNEL)  
475 assays using *in situ* cell death detection kit (Promega). All images were acquired using  
476 a Zeiss LSM710 confocal microscope and Zen software (Zeiss).

477

### 478 **Immunoblotting**

479 Frozen retinas were lysed by sonication in lysis buffer (20 mM Na<sub>2</sub>HPO<sub>4</sub>, 250 mM  
480 NaCl, 30 mM NaPPi, 0.1% NP40, 5mM EDTA, 5mM DTT) supplemented with protease  
481 inhibitor cocktail (Sigma-Aldrich). Lysates concentration was determined using a Lowry  
482 protein assay kit (Bio-Rad) following sonication and centrifugation. Protein  
483 supernatants were separated under denaturing condition by SDS-PAGE, transferred

484 onto nitrocellulose membrane and probed with antibodies (listed in Supplementary  
485 Table 1.), as described (Hamon et al., 2019). Proteins were visualized using enhanced  
486 chemiluminescence kit (Bio-Rad).  $\alpha$ -tubulin was used for normalization. Quantification  
487 was performed using ImageJ software (<http://imagej.nih.gov/ij/>; provided in the public  
488 domain at NIH).

489

#### 490 **Retinal flat mount**

491 Fixed retinas were permeabilized and blocked in a solution containing 0.5% Triton-  
492 X100, 5% donkey normal serum, 1XPBS, 0.1 g/L thimerosal for 1 day at RT under  
493 agitation. Primary antibodies were diluted in a solution containing 0.5% Triton-X100,  
494 5% donkey normal serum, 10% Dimethyl Sulfoxide, 1XPBS, 0.1 g/L thimerosal for 3  
495 days at RT under agitation. The retinas were then washed for 1 day in PBST (1XPBS,  
496 0.5% Triton-X100). Secondary antibodies were diluted in the same solution as primary  
497 antibodies and left for 2 days. After washing retinas for 1 day, they were mounted on  
498 slides and imaged using a scanning confocal microscope (Olympus, FV1000). Primary  
499 and secondary antibodies are listed in Supplementary Table 1.

#### 500 **Electroretinography**

501 Electroretinogram (ERG) recordings were performed using a focal ERG module  
502 attached to Micron IV (Phoenix Research Laboratory). Briefly, mice were dark-adapted  
503 overnight and prepared for the experiment under dim-red light. The mice were  
504 anesthetized with ketamine (100 mg/kg) and xylazine (10mg/kg) and received topical  
505 proparacaine hydrochloride (0.5%, Alcon) via eye drops. Pupils were dilated with  
506 tropicamide (1%, Alcon) and phenylephrine (2.5%, Alcon) and lightly coated with  
507 GONAK hypromellose ophthalmic demulcent solution (2.5%, Akorn). Lens of the  
508 Micron IV was placed directly on the cornea, and a reference electrode was placed on  
509 the mouse head. Scotopic responses were elicited with a series of flashes of increasing  
510 light intensities from -1.7 to 2.2 cd.s/m<sup>2</sup>. Photopic responses were elicited under rod-  
511 desensitizing background light with a series of flashes of increasing light intensities  
512 from -0.5 to 2.8 cd.s/m<sup>2</sup>. Values of a- and b-wave were extracted and plotted for  
513 comparisons between groups of interest.

514

#### 515 **Optomotor response (OMR)**

516 Real time video tracking and automated measurements of compensatory head  
517 movements in freely moving mice were performed using an OMR recording setup  
518 (Kretschmer et al., 2013, 2015) (Phenosys, Berlin, Germany). Each mouse was placed  
519 on a platform in the center of four computer-controlled LCD monitors. Visual stimuli  
520 were sinusoidally modulated luminance gratings generated by four LCD screens (60  
521 Hz refresh rate; OkrArena, PhenoSys GmbH, Berlin, Germany), presented with a  
522 constant rotation. Video tracking considered the animal's distance to the monitors,  
523 thereby keeping the spatial frequency of the retinal image constant and providing data  
524 for automated OMR quantifications.

525 OMRs were recorded using two different Michelson contrasts and different spatial  
526 frequencies (presented in random order) in the two mouse groups: 100% contrast or  
527 50% contrast (n=13 for *Gsk3 $\alpha$ <sup>fl/+</sup> $\beta$ <sup>fl/fl</sup>* and 18 for *Gsk3 $\alpha$ <sup>fl/+</sup> $\beta$ <sup>fl/fl</sup>;  $\alpha$ -Cre* genotype). All stimuli  
528 were presented for 60 s randomly in either clockwise or counterclockwise direction.

529 The measurements were completed in three trials for each animal. At 100% and 50%  
530 contrast, OMRs were recorded in response to sinusoidal gratings at 12 spatial  
531 frequencies between 0.0125 and 0.5 cycles per degree (cpd). The number of head  
532 movements recorded at a speed range from 2 to 14 degrees per second in the same  
533 direction as the stimulus (T\_Correct) and in the opposite direction (T\_Incorrect) were  
534 used to calculate the OMR indices ( $T\_Correct / T\_Incorrect$ ) at each spatial frequency.  
535

### 536 **Retrograde labeling of retinal ganglion cells**

537 For retrograde labeling, eyes were enucleated with a piece of the optic nerve and fixed  
538 in 4% PFA for 30 min. Rhodamine B isothiocyanate–Dextran (Sigma-Aldrich) was  
539 applied on the top of the optic nerve and incubated for 60 min. Eyes were flat mounted  
540 after the remaining dye was washed out for 48 hours in PBS at 4°C. Z series images  
541 were acquired using SP5 confocal microscope (Leica Biosystems), and 3D  
542 reconstruction was performed using Volocity (Perkin Elmer).  
543

### 544 **Anterograde labeling of retinal ganglion cell projections**

#### 545 Anterograde labeling

546 For anterograde tracing of retinal projections, a Cholera Toxin beta subunit (CTB) was  
547 used. Animal were anesthetized using a cocktail of ketamine (60 mg/kg) and xylazine  
548 (10 mg/kg) and a subsequent bilateral injection of 1.2uL CTB at 1mg/ml coupled to  
549 either an Alexa-555 or -647 (Lifesciences) were performed intravitreally. Three days  
550 following the injection, mice were perfused with 4% PFA.

#### 551 Tissue Clearing and 3D imaging

552 For 3D imaging of CTB-labeled brains, a methanol clearing protocol was carried out  
553 using modification from the iDISCO+ protocol (Belle et al., 2014, 2017). Briefly, brains  
554 were dehydrated by immersion in progressive baths of methanol/1X PBS (20%, 40%,  
555 60%, 80%, 100%, 100%) for 2 hours each at RT on a tube rotator (SB3, Stuart) at  
556 14rpm, using a 15 mL centrifuge tube (TPP, Dutcher) protected from light. Following  
557 these baths, samples were immersed overnight in 2/3 Dichloromethane (DCM; Sigma-  
558 Aldrich) and then a 30-min bath in 100 % DCM before being transferred in Di-Benzyl  
559 Ether (DBE; Sigma-Aldrich) overnight prior imaging.

560 3D imaging/Image acquisition for all samples was performed as previously described  
561 (Dobin et al., 2013). Acquisitions were done using an ultramicroscope I (LaVision  
562 Biotec) with the ImspectorPro software (LaVision Biotec). The step size between each  
563 image was fixed at 2  $\mu\text{m}$  with a numerical aperture of 0.120 and 150ms acquisition  
564 using a PCO Edge SCMOS CCD camera (2,560 x 2,160 pixel size, LaVision BioTec).

#### 565 Image analysis

566 Imaris x64 software (Version9.1.2, Bitplane) was used for all image analysis. Stack  
567 images were first converted from .tiff to .ims files using the Imaris file converter v9.1.2.  
568 3D reconstruction was visualized with the “volume rendering” function. To isolate ipsi-  
569 and contralateral MTN volumes, manual segmentation was carried out using the  
570 “surface” tool and the isoline selection (density, 10%). Each ipsi- and contra-lateral  
571 projection of the MTN was segmented to generate a volume ( $\mu\text{m}^3$ ). Movie



572 reconstruction with .tiff series were done with ImageJ (1.50e, Java 1.8.0\_60, 64-bit)  
573 and iMovie (version 10.1.1).

### 574 **Whole transcriptome sequencing and data analysis**

575 Whole transcriptome analysis was performed on three independent biological  
576 replicates from *Gsk3 $\alpha^{fl/+}$  $\beta^{fl/fl};\alpha$ -Cre* and *Gsk3 $\alpha^{fl/+}$  $\beta^{fl/fl}$*  retina at P60. After harvesting, both  
577 retinas for each animal were immediately frozen. RNA was extracted using Nucleospin  
578 RNA Plus kit (Macherey-Nagel). RNA quality and quantity were evaluated using a  
579 BioAnalyzer 2100 with RNA 6000 Nano Kit (Agilent Technologies). Stranded RNA-Seq  
580 libraries were constructed from 100 ng high-quality total RNA (RIN > 8) using the  
581 TruSeq Stranded mRNA Library Preparation Kit (Illumina). Paired-end sequencing of  
582 40 bases length was performed on a NextSeq 500 system (Illumina). Pass-filtered  
583 reads were mapped using STAR and aligned to mouse reference genome GRCm38.94  
584 (Dobin et al., 2013). Count table of the gene features was obtained using  
585 FeatureCounts (Liao et al., 2014). Normalization, differential expression analysis and  
586 FPKM (fragments per kilobase of exon per million fragments mapped) values were  
587 computed using EdgeR (Chen et al., 2015). An FPKM filtering cutoff of 1 in at least one  
588 of the 6 samples was applied. A False Discovery Rate (FDR) of less than or equal to  
589 0.05 was considered significant and a fold change cutoff of 1.5 was applied to identify  
590 differentially expressed genes. Comprehensive gene list analysis, enriched biological  
591 pathways, gene annotation, were based on Gene Ontology classification system using  
592 Metascape (Zhou et al., 2019). Data visualization was done using GOplot R package  
593 (Walter et al., 2015). To evaluate the expression of the DEGs in RGCs, we used  
594 published whole transcriptome analysis from purified RGCs available on Gene  
595 Expression Omnibus database (GSE87647) (Sajgo et al., 2017).

596

### 597 **Gene expression analysis by Real-Time PCR (RT-qPCR)**

598 After RNA extraction using Nucleospin RNA Plus kit (Macherey-Nagel), 500 ng of total  
599 RNA was reverse transcribed using the iScript cDNA Synthesis Kit according to  
600 manufacturer instructions (BioRad). Primers used for RT-qPCR are shown in  
601 Supplementary Table 2. For each RT-qPCR, 2  $\mu$ L of a ten-fold dilution of synthesized  
602 cDNA was used, and the reactions were performed in technical triplicates on a C1000  
603 thermal cycler (CFX96 real-time system, BioRad) using SsoFast EvaGreen Supermix  
604 (BioRad) as previously described (Livak and Schmittgen, 2001). RT-qPCR  
605 experiments were performed on three independent biological replicates. Differential  
606 expression was determined using the  $\Delta\Delta$ Ct method with the geometric average of  
607 *Rps26* and *Srp72* as endogenous controls (Livak and Schmittgen, 2001).

608

### 609 **Statistical analysis**

610 Statistical analysis was performed with GraphPad Prism 8.3.0 (GraphPad Software,  
611 La Jolla California USA). Results are reported as mean  $\pm$  SEM. Nonparametric Mann-  
612 Whitney U test was used to analyze cell counting and qPCR data. *P* value  $\leq$  0.05 was  
613 considered significant. For OMR assay statistical analysis, a Grubbs test was  
614 performed at 5% to remove outliers followed by 2-way ANOVA (genotype and spatial  
615 frequency) with Bonferroni Post Hoc test. *P* value  $\leq$  0.05 was considered significant.



616

## 617 **ACKNOWLEDGEMENT**

618 We are grateful to Dr. Jim Woodgett for providing the *Gsk3* floxed lines and Tudor  
619 Badea and Peter Gruss for the alpha-Cre line. We would like also to thank Leah  
620 Thomas, Elodie-Kim Grellier, Yide Mi, and Jessica Gumerson for their help with mouse  
621 colonies and technical support. This research was supported by the CNRS, Retina  
622 France and by the Intramural Research Program of the National Eye Institute  
623 (EY000450 and EY000546). EK was supported by the Ernst Ludwig Ehrlich  
624 Studienwerk.

625

## 626 **AUTHOR'S CONTRIBUTION**

627 E.K., R.J.V., C.H., designed and performed the experiments and analyzed the data,  
628 S.L. AND P.S. performed the experiments and analyzed the data, A.C. designed the  
629 experiments, analyzed the data and revised the manuscript, M.P., A.S., J.E.R.  
630 designed the study, analyzed the data, wrote the manuscript with the help of E.K. R.J.V  
631 and C.H. J.E.R supervised the study.

632

## 633 **REFERENCES**

- 634 Balkema, G.W., and Dräger, U.C. (1990). Origins of uncrossed retinofugal projections  
635 in normal and hypopigmented mice. *Visual Neuroscience* 4, 595–604.
- 636 Bejarano-Escobar, R., Álvarez-Hernán, G., Morona, R., González, A., Martín-Partido,  
637 G., and Francisco-Morcillo, J. (2015). Expression and function of the LIM-  
638 homeodomain transcription factor *Islet-1* in the developing and mature vertebrate  
639 retina. *Experimental Eye Research* 138, 22–31.
- 640 Belle, M., Godefroy, D., Dominici, C., Heitz-Marchaland, C., Zelina, P., Hellal, F.,  
641 Bradke, F., and Chédotal, A. (2014). A simple method for 3D analysis of  
642 immunolabeled axonal tracts in a transparent nervous system. *Cell Reports* 9, 1191–  
643 1201.
- 644 Belle, M., Godefroy, D., Couly, G., Malone, S.A., Collier, F., Giacobini, P., and  
645 Chédotal, A. (2017). Tridimensional Visualization and Analysis of Early Human  
646 Development. *Cell* 169, 161-173.e12.
- 647 Buhl, E.H., and Dann, J.F. (1988). Morphological diversity of displaced retinal ganglion  
648 cells in the rat: A lucifer yellow study. *Journal of Comparative Neurology* 269, 210–  
649 218.
- 650 Chen, Y., McCarthy, D., Robinson, M., and Smyth, G.K. (2015). *edgeR: differential*  
651 *expression analysis of digital gene expression data User 's Guide*.
- 652 Cole, A.R. (2012). *GSK3 as a Sensor Determining Cell Fate in the Brain*. *Frontiers in*  
653 *Molecular Neuroscience* 5, 1–10.

- 654 Cook, J.E., and Podugolnikova, T.A. (2001). Evidence for spatial regularity among  
655 retinal ganglion cells that project to the accessory optic system in a frog, a reptile, a  
656 bird, and a mammal. *Visual Neuroscience* 18, 289–297.
- 657 Dobin, A., Davis, C.A., Schlesinger, F., Drenkow, J., Zaleski, C., Jha, S., Batut, P.,  
658 Chaisson, M., and Gingeras, T.R. (2013). STAR: Ultrafast universal RNA-seq aligner.  
659 *Bioinformatics* 29, 15–21.
- 660 Doble, B.W., and Woodgett, J.R. (2003). GSK-3: Tricks of the trade for a multi-tasking  
661 kinase. *Journal of Cell Science* 116, 1175–1186.
- 662 Doble, B.W., Patel, S., Wood, G.A., Kockeritz, L.K., and Woodgett, J.R. (2007).  
663 Functional redundancy of GSK-3 $\alpha$  and GSK-3 $\beta$  in Wnt/beta-catenin signaling  
664 shown by using an allelic series of embryonic stem cell lines. *Developmental Cell* 12,  
665 957–971.
- 666 Doi, M., Imatani, H., Sasoh, M., Uji, Y., and Yamamura, H. (1994). Displaced retinal  
667 ganglion cells in the Chinese hamster. *Japanese Journal of Ophthalmology* 38, 139–  
668 143.
- 669 Dräger, U.C., and Olsen, J.F. (1980). Origins of crossed and uncrossed retinal  
670 projections in pigmented and albino mice. *Journal of Comparative Neurology* 191,  
671 383–412.
- 672 Eom, T.Y., and Jope, R.S. (2009). Blocked Inhibitory Serine-Phosphorylation of  
673 Glycogen Synthase Kinase-3 $\alpha/\beta$  Impairs In Vivo Neural Precursor Cell Proliferation.  
674 *Biological Psychiatry* 66, 494–502.
- 675 Espinosa, L., Inglés-Esteve, J., Aguilera, C., and Bigas, A. (2003). Phosphorylation by  
676 glycogen synthase kinase-3 $\beta$  down-regulates Notch activity, a link for Notch and Wnt  
677 pathways. *Journal of Biological Chemistry* 278, 32227–32235.
- 678 Fite, K. v, Brecha, N., Karten, H.J., and Hunt, S.P. (1981). Displaced ganglion cells  
679 and the accessory optic system of pigeon. *The Journal of Comparative Neurology* 195,  
680 279–288.
- 681 Fu, X., Sun, H., Klein, W.H., and Mu, X. (2006). B-Catenin Is Essential for Lamination  
682 But Not Neurogenesis in Mouse Retinal Development. *Developmental Biology* 299,  
683 424–437.
- 684 Galli-Resta, L., and Ensini, M. (1996). An intrinsic time limit between genesis and death  
685 of individual neurons in the developing retinal ganglion cell layer. *Journal of*  
686 *Neuroscience* 16, 2318–2324.
- 687 Giolli, R.A., Blanks, R.H.I., and Lui, F. (2006). The accessory optic system: basic  
688 organization with an update on connectivity, neurochemistry, and function. *Progress in*  
689 *Brain Research* 151, 407–440.

- 690 Golpich, M., Amini, E., Hemmati, F., Ibrahim, N.M., Rahmani, B., Mohamed, Z.,  
691 Raymond, A.A., Dargahi, L., Ghasemi, R., and Ahmadiani, A. (2015). Glycogen  
692 synthase kinase-3 beta (GSK-3 $\beta$ ) signaling: Implications for Parkinson's disease.  
693 *Pharmacological Research* 97, 16–26.
- 694 Hamon, A., García-García, D., Ail, D., Bitard, J., Chesneau, A., Dalkara, D., Locker,  
695 M., Roger, J.E., and Perron, M. (2019). Linking YAP to Müller Glia Quiescence Exit in  
696 the Degenerative Retina. *Cell Reports* 27, 1712-1725.e6.
- 697 Hur, E.-M., and Zhou, F.-Q. (2010). GSK3 signalling in neural development. *Nature*  
698 *Reviews. Neuroscience* 11, 539–551.
- 699 Jacobs, K.M., Bhave, S.R., Ferraro, D.J., Jaboin, J.J., Hallahan, D.E., and Thotala, D.  
700 (2012). GSK-3 $\beta$ : A Bifunctional Role in Cell Death Pathways. *International Journal of*  
701 *Cell Biology* 2012, 930710.
- 702 Jin, Y.H., Kim, H., Oh, M., Ki, H., and Kim, K. (2009). Regulation of Notch1/NICD and  
703 Hes1 expressions by GSK-3 $\alpha/\beta$ . *Molecules and Cells* 27, 15–19.
- 704 Karten, H.J., Fite, K. v., and Brecha, N. (1977). Specific projection of displaced retinal  
705 ganglion cells upon the accessory optic system in the pigeon (*Columbia livia*).  
706 *Proceedings of the National Academy of Sciences of the United States of America* 74,  
707 1753–1756.
- 708 Kay, J.N., de la Huerta, I., Kim, I.J., Zhang, Y., Yamagata, M., Chu, M.W., Meister, M.,  
709 and Sanes, J.R. (2011). Retinal ganglion cells with distinct directional preferences  
710 differ in molecular identity, structure, and central projections. *Journal of Neuroscience*  
711 31, 7753–7762.
- 712 Kim, W.-Y., Wang, X., Wu, Y., Doble, B.W., Patel, S., Woodgett, J.R., and Snider, W.D.  
713 (2009). GSK-3 is a master regulator of neural progenitor homeostasis. *Nature*  
714 *Neuroscience* 12, 1390–1397.
- 715 Krause, M., Distler, C., and Hoffmann, K.P. (2014). Retinal ganglion cells projecting to  
716 the accessory optic system in optokinetic blind albinotic rats are direction-selective.  
717 *European Journal of Neuroscience* 40, 2274–2282.
- 718 Kremer, A. (2011). GSK3 and Alzheimer's disease: facts and fiction.... *Frontiers in*  
719 *Molecular Neuroscience* 4, 1–10.
- 720 Kretschmer, F., Kretschmer, V., Kunze, V.P., and Kretzberg, J. (2013). OMR-arena:  
721 Automated measurement and stimulation system to determine mouse visual  
722 thresholds based on optomotor responses. *PLoS ONE* 8, 78058.
- 723 Kretschmer, F., Sajgo, S., Kretschmer, V., and Badea, T.C. (2015). A system to  
724 measure the Optokinetic and Optomotor response in mice. *Journal of Neuroscience*  
725 *Methods* 256, 91–105.

- 726 Li, D.W., Liu, Z.Q., Chen, W., Yao, M., and Li, G.R. (2014). Association of glycogen  
727 synthase kinase-3 $\beta$  with Parkinson's disease (Review). *Molecular Medicine Reports* 9,  
728 2043–2050.
- 729 Li, S., Mattar, P., Zinyk, D., Singh, K., Chaturvedi, C.-P., Kovach, C., Dixit, R.,  
730 Kurrasch, D.M., Ma, Y.-C., Chan, J.A., et al. (2012). GSK3 temporally regulates  
731 neurogenin 2 proneural activity in the neocortex. *The Journal of Neuroscience: The*  
732 *Official Journal of the Society for Neuroscience* 32, 7791–7805.
- 733 Liao, Y., Smyth, G.K., and Shi, W. (2014). FeatureCounts: An efficient general purpose  
734 program for assigning sequence reads to genomic features. *Bioinformatics* 30, 923–  
735 930.
- 736 Livak, K.J., and Schmittgen, T.D. (2001). Analysis of relative gene expression data  
737 using real-time quantitative PCR and the 2- $\Delta\Delta$ CT method. *Methods* 25, 402–408.
- 738 Marcus, E.A., Kintner, C., and Harris, W. (1998). The role of GSK3 $\beta$  in regulating  
739 neuronal differentiation in *Xenopus laevis*. *Molecular and Cellular Neurosciences* 12,  
740 269–280.
- 741 Marquardt, T., Ashery-Padan, R., Andrejewski, N., Scardigli, R., Guillemot, F., and  
742 Gruss, P. (2001). Pax6 is required for the multipotent state of retinal progenitor cells.  
743 *Cell* 105, 43–55.
- 744 Maurer, U., Preiss, F., Brauns-Schubert, P., Schlicher, L., and Charvet, C. (2014).  
745 GSK-3 - at the crossroads of cell death and survival. *Journal of Cell Science* 127,  
746 1369–1378.
- 747 Medina, M., Garrido, J.J., and Wandosell, F.G. (2011). Modulation of GSK-3 as a  
748 Therapeutic Strategy on Tau Pathologies. *Frontiers in Molecular Neuroscience* 4, 1–  
749 10.
- 750 Moore, K.B., Schneider, M.L., and Vetter, M.L. (2002). Posttranslational mechanisms  
751 control the timing of bHLH function and regulate retinal cell fate. *Neuron* 34, 183–195.
- 752 Mouritsen, H., Janssen-Bienhold, U., Liedvogel, M., Feenders, G., Stalleicken, J.,  
753 Dirks, P., and Weiler, R. (2004). Cryptochromes and neuronal-activity markers  
754 colocalize in the retina of migratory birds during magnetic orientation. *Proceedings of*  
755 *the National Academy of Sciences of the United States of America* 101, 14294–14299.
- 756 Nadal-Nicolás, F.M., Jiménez-López, M., Salinas-Navarro, M., Sobrado-Calvo, P.,  
757 Alburquerque-Béjar, J.J., Vidal-Sanz, M., and Agudo-Barriuso, M. (2012). Whole  
758 Number, Distribution and Co-Expression of Brn3 Transcription Factors in Retinal  
759 Ganglion Cells of Adult Albino and Pigmented Rats. *PLoS ONE* 7, e49830.
- 760 Nadal-Nicolás, F.M., Salinas-Navarro, M., Jiménez-López, M., Sobrado-Calvo, P.,  
761 Villegas-Pérez, M.P., Vidal-Sanz, M., and Agudo-Barriuso, M. (2014). Displaced  
762 retinal ganglion cells in albino and pigmented rats. *Frontiers in Neuroanatomy* 8, 1–21.

- 763 Nießner, C., Gross, J.C., Denzau, S., Peichl, L., Fleissner, G., Wiltschko, W., and  
764 Wiltschko, R. (2016). Seasonally changing cryptochrome 1b expression in the retinal  
765 ganglion cells of a migrating passerine bird. *PLoS ONE* 11, e0150377.
- 766 Ouchi, Y., Baba, Y., Koso, H., Taketo, M.M., Iwamoto, T., Aburatani, H., and  
767 Watanabe, S. (2011).  $\beta$ -Catenin signaling regulates the timing of cell differentiation in  
768 mouse retinal progenitor cells. *Molecular and Cellular Neuroscience* 46, 770–780.
- 769 Pachenari, N., Kiani, S., and Javan, M. (2017). Inhibition of glycogen synthase kinase  
770 3 increased subventricular zone stem cells proliferation. *Biomedicine &  
771 Pharmacotherapy = Biomedecine & Pharmacotherapie* 93, 1074–1082.
- 772 Pang, J.-J., and Wu, S.M. (2011). Morphology and immunoreactivity of retrogradely  
773 double-labeled ganglion cells in the mouse retina. *Investigative Ophthalmology &  
774 Visual Science* 52, 4886–4896.
- 775 Pérezleón, J.A., Osorio-Paz, I., Francois, L., and Salceda, R. (2013).  
776 Immunohistochemical localization of glycogen synthase and GSK3 $\beta$ : Control of  
777 glycogen content in retina. *Neurochemical Research* 38, 1063–1069.
- 778 Rodriguez, A.R., de Sevilla Müller, L.P., and Brecha, N.C. (2014). The RNA binding  
779 protein RBPMS is a selective marker of ganglion cells in the mammalian retina. *Journal  
780 of Comparative Neurology* 522, 1411–1443.
- 781 Roger, J.E.J.E., Nellissery, J., Kim, D.S.D.S.D.S., and Swaroop, A. (2010).  
782 Sumoylation of bZIP transcription factor NRL modulates target gene expression during  
783 photoreceptor differentiation. *Journal of Biological Chemistry* 285, 25637–25644.
- 784 Roger, J.E.J.E.E., Ranganath, K., Zhao, L., Cojocaru, R.I.R.I.I.R.I., Brooks, M., Gotoh,  
785 N., Veleri, S., Hiriyanna, A., Rachel, R.A.R.A.R.A., Campos, M.M.M.M.M., et al. (2012).  
786 Preservation of cone photoreceptors after a rapid yet transient degeneration and  
787 remodeling in cone-only *Nrl*<sup>-/-</sup> mouse retina. *J Neurosci* 32, 528–541.
- 788 Rousso, D.L., Qiao, M., Kagan, R.D., Yamagata, M., Palmiter, R.D., and Sanes, J.R.  
789 (2016). Two Pairs of ON and OFF Retinal Ganglion Cells Are Defined by Intersectional  
790 Patterns of Transcription Factor Expression. *Cell Reports* 15, 1930–1944.
- 791 Sajgo, S., Ghinia, M.G., Brooks, M., Kretschmer, F., Chuang, K., Hiriyanna, S., Wu, Z.,  
792 Popescu, O., and Badea, T.C. (2017). Molecular codes for cell type specification in  
793 *Brn3* retinal ganglion cells. *Proceedings of the National Academy of Sciences of the  
794 United States of America* 114, E3974–E3983.
- 795 Sato, C., Iwai-Takekoshi, L., Ichikawa, Y., and Kawasaki, H. (2017). Cell type-specific  
796 expression of FoxP2 in the ferret and mouse retina. *Neuroscience Research* 117, 1–  
797 13.
- 798 Shimizu, T., Kagawa, T., Inoue, T., Nonaka, A., Takada, S., Aburatani, H., and Taga,  
799 T. (2008). Stabilized beta-catenin functions through TCF/LEF proteins and the



- 800 Notch/RBP-Jkappa complex to promote proliferation and suppress differentiation of  
801 neural precursor cells. *Molecular and Cellular Biology* 28, 7427–7441.
- 802 Simpson, J.I. (1984). The Accessory Optic System. *Annual Review of Neuroscience* 7,  
803 13–41.
- 804 Sweeney, N.T., Tierney, H., and Feldheim, D.A. (2014). Tbr2 is required to generate a  
805 neural circuit mediating the pupillary light reflex. *The Journal of Neuroscience : The*  
806 *Official Journal of the Society for Neuroscience* 34, 5447–5453.
- 807 Sweeney, N.T., James, K.N., Nistorica, A., Lorig-Roach, R.M., and Feldheim, D.A.  
808 (2019). Expression of transcription factors divides retinal ganglion cells into distinct  
809 classes. *Journal of Comparative Neurology* 527, 225–235.
- 810 Wall, D.S., Mears, A.J., McNeill, B., Mazerolle, C., Thurig, S., Wang, Y., Kageyama,  
811 R., and Wallace, V.A. (2009). Progenitor cell proliferation in the retina is dependent on  
812 Notch-independent Sonic hedgehog/Hes1 activity. *Journal of Cell Biology* 184, 101–  
813 112.
- 814 Walter, W., Sánchez-Cabo, F., and Ricote, M. (2015). GOplot: an R package for  
815 visually combining expression data with functional analysis. *Bioinformatics (Oxford,*  
816 *England)* 31, 2912–2914.
- 817 Wang, B., and Li, Y. (2006). Evidence for the direct involvement of  $\beta$ TrCP in Gli3  
818 protein processing. *Proceedings of the National Academy of Sciences of the United*  
819 *States of America* 103, 33–38.
- 820 Yonehara, K., Ishikane, H., Sakuta, H., Shintani, T., Nakamura-Yonehara, K., Kamiji,  
821 N.L., Usui, S., and Noda, M. (2009). Identification of retinal ganglion cells and their  
822 projections involved in central transmission of information about upward and downward  
823 image motion. *PLoS ONE* 4, e4320.
- 824 Young, R.W. (1984). Cell death during differentiation of the retina in the mouse. *Journal*  
825 *of Comparative Neurology* 229, 362–373.
- 826 Zhou, Y., Zhou, B., Pache, L., Chang, M., Khodabakhshi, A.H., Tanaseichuk, O.,  
827 Benner, C., and Chanda, S.K. (2019). Metascape provides a biologist-oriented  
828 resource for the analysis of systems-level datasets. *Nature Communications* 10, 1523.
- 829
- 830

831 **FIGURES AND FIGURE LEGENDS**

832

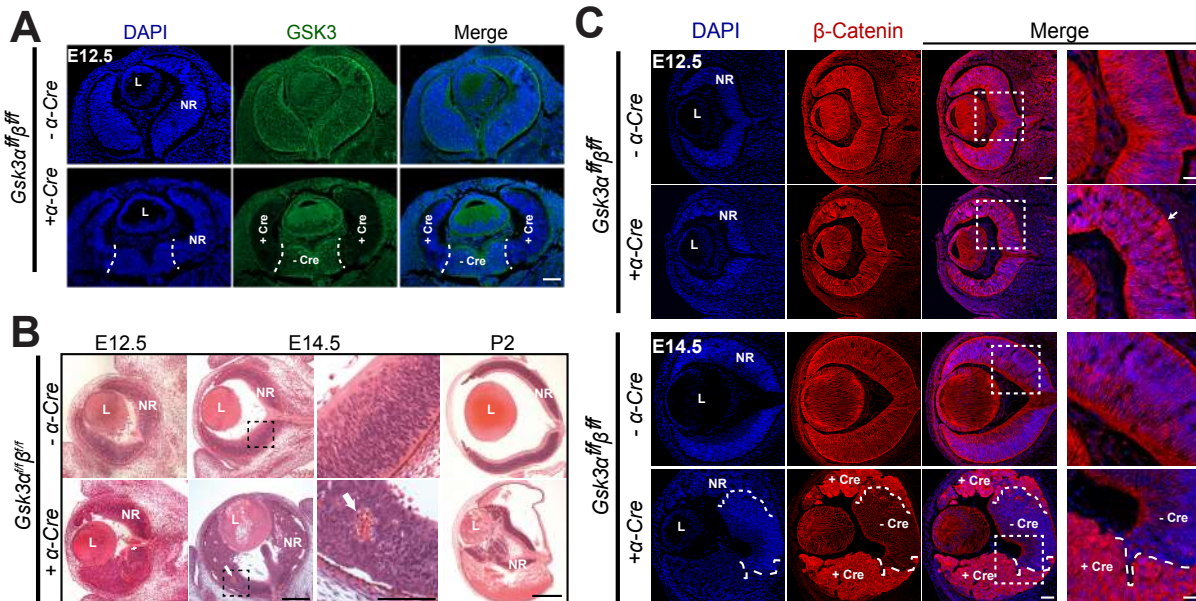

833

834

835

836 **Figure 1. Developmental defects and microphthalmia in *Gsk3*-deficient retina**  
837 **with aberrant nuclear translocation of  $\beta$ -catenin, a key effector of the Wnt**  
838 **canonical pathway.** (A) Immunohistochemistry (IHC) of E12.5 retina from *Gsk3 $\alpha$ <sup>fl/fl</sup> $\beta$ <sup>fl/fl</sup>*  
839 mice expressing or not  $\alpha$ -Cre using a pan-GSK3 antibody (green) shows efficient  
840 deletion at the periphery where the Cre expression has been previously reported  
841 (delimited by dashed-line) Scale bar: 100  $\mu$ m. (B) Hematoxylin and eosin (H&E)  
842 staining on methacrylate sections at E12.5, E14.5 and P2 reveals large retinal  
843 morphogenesis defects in *Gsk3 $\alpha$ <sup>fl/fl</sup> $\beta$ <sup>fl/fl</sup>;  $\alpha$ -Cre* with blood invasion into the eyeball  
844 (showed by white arrow). L, Lens; NR, neural retina. Scale bar: 100  $\mu$ m at E12.5 and  
845 E14.5. 500  $\mu$ m at P2. For the magnification of P14.5, scale bar: 50  $\mu$ m. (C)  $\beta$ -catenin  
846 accumulation (red) at E14.5 in the Cre-expressing area of *Gsk3 $\alpha$ <sup>fl/fl</sup> $\beta$ <sup>fl/fl</sup>;  $\alpha$ -Cre*  
847 animals. White arrow indicates a small area of accumulation. Magnification on the right panel  
848 shows the squared delimited area of  $\beta$ -catenin accumulation. L, Lens; NR, neural  
849 retina; + Cre, Cre-expressing area; - Cre, area without Cre expression Scale bar:  
850 100  $\mu$ m, magnification area scale bar: 40  $\mu$ m.

851

852

853

854

855

856

857

858

859

860

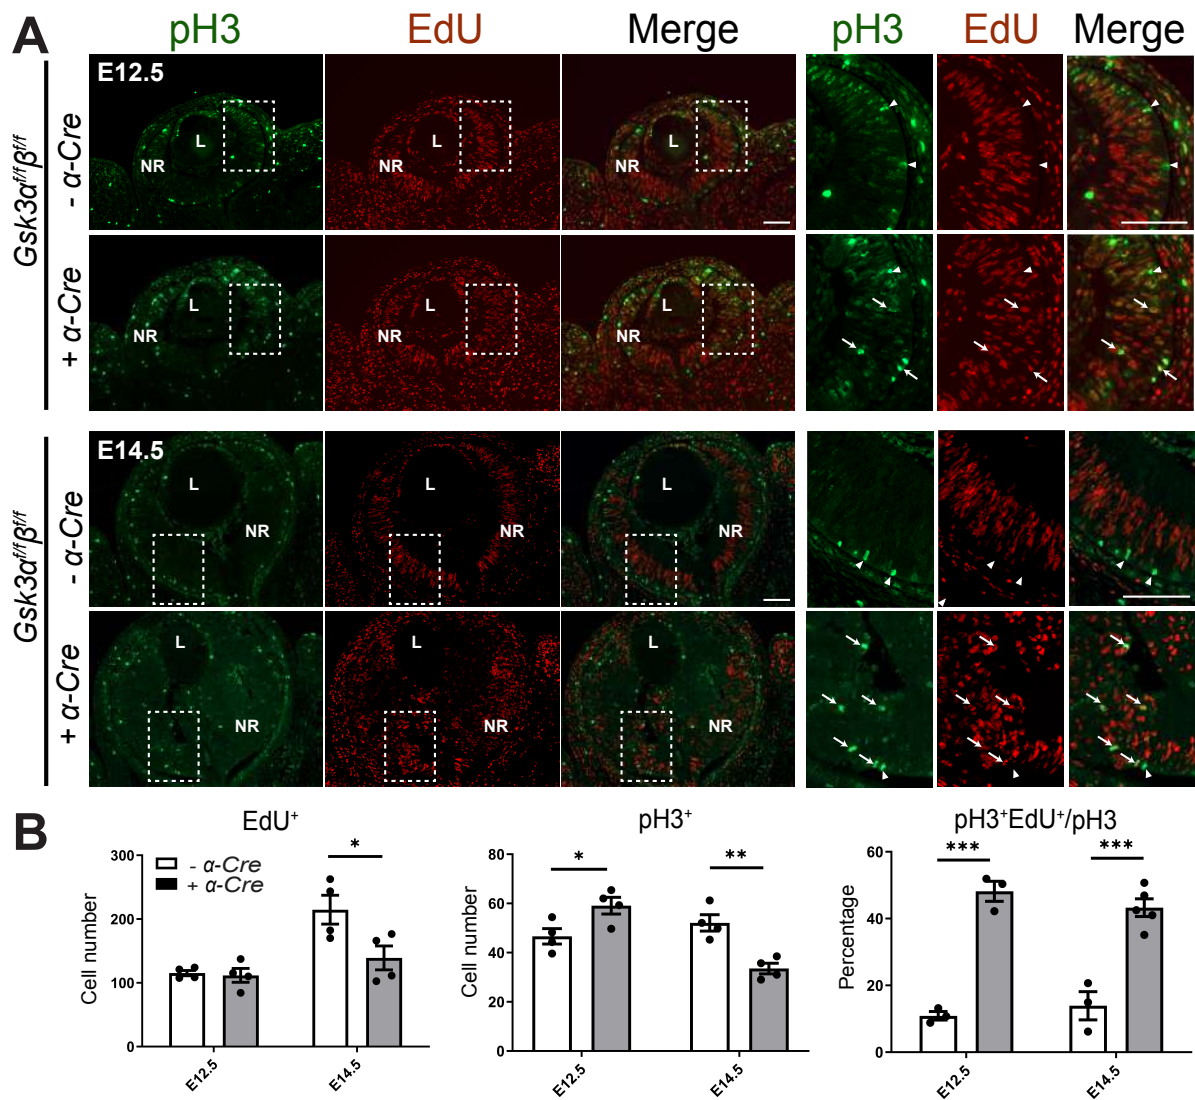

861

862

863 **Figure 2. Lack of GSK3 signaling alters cell cycle progression of retinal**

864 **progenitor cells.** (A) Mislocalization of pH3-positive cells in the neuroblastic layer of

865 *Gsk3α<sup>fl/fl</sup>β<sup>fl/fl</sup>;α-Cre* retina. E12.5 and E14.5 retina stained for pH3 (late-G2/M-phase,

866 pH3-positive and EdU (marker of S-phase, red) following a 16H chase. Magnification on the

867 right panel shows the squared delimited area. Arrowheads, pH3-positive and EdU-

868 negative cells; Arrows, pH3- and EdU-positive cells. Scale bar: 100 μm, magnification

869 area scale bar: 100 μm. (B) Lack of GSK3 signaling alters cell cycle progression of

870 retinal progenitors. Quantification at E12.5 and E14.5 of the number of EdU-positive

871 cells (left panel), pH3-positive cells (middle panel) and double positive cells for EdU

872 and pH3 among pH3-positive cells (right panel) in *Gsk3α<sup>fl/fl</sup>β<sup>fl/fl</sup>;α-Cre* animals and

873 controls. Mean ± SEM values are presented from 3 to 5 independent retinas for each

874 genotype, \* indicates  $P \leq 0.05$ , \*\* indicates  $P \leq 0.01$ , \*\*\* indicates  $P \leq 0.001$ .

875

876

877

878

879



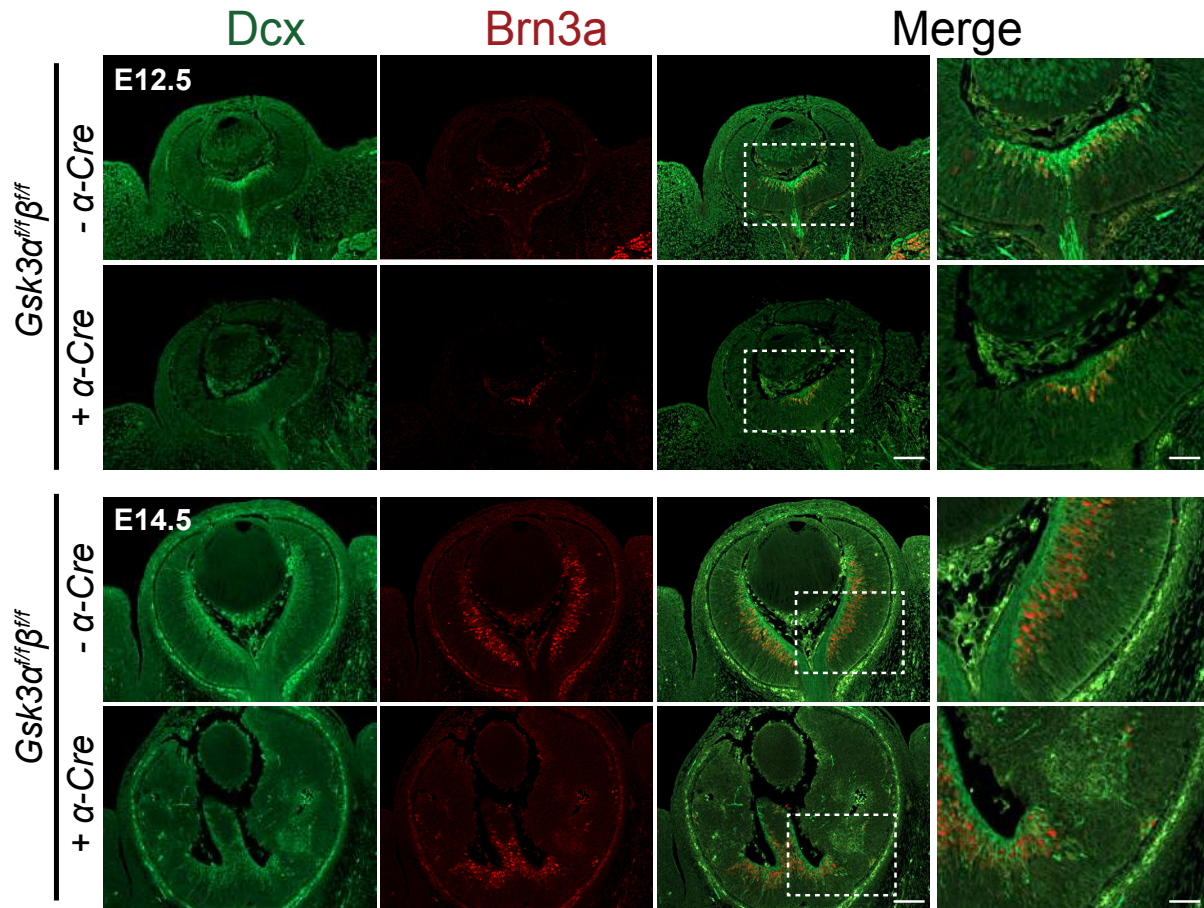

880  
881

882 **Figure 3. Lack of *Gsk3 $\alpha$*  and *Gsk3 $\beta$*  expression in retinal progenitors blocks**  
883 **retinal progenitor differentiation.** IHC using Doublecortin (Dcx) (green) and Brn3a  
884 (red) antibodies shows the localization of neuronal precursor cells and RGCs,  
885 respectively, at the central and basal part of the neuroblastic layer of E12.5 control  
886 retina. In contrast, neural differentiation is not observed in *Gsk3 $\alpha^{ff}\beta^{ff};\alpha$ -Cre* retina, with  
887 the exception of a small central area where Cre is not expressed. At E14.5, Dcx- and  
888 Brn3a-positive cells are distributed across the whole retina in controls, whereas they  
889 are absent in periphery in *Gsk3 $\alpha^{ff}\beta^{ff};\alpha$ -Cre* mice. Magnification on the right-hand side  
890 shows the squared delimited area and depicts the boundary between a Cre-positive  
891 and a Cre-negative area. Scale bar: 100  $\mu$ m, magnification 40  $\mu$ m.

892  
893  
894  
895  
896  
897  
898  
899  
900  
901  
902

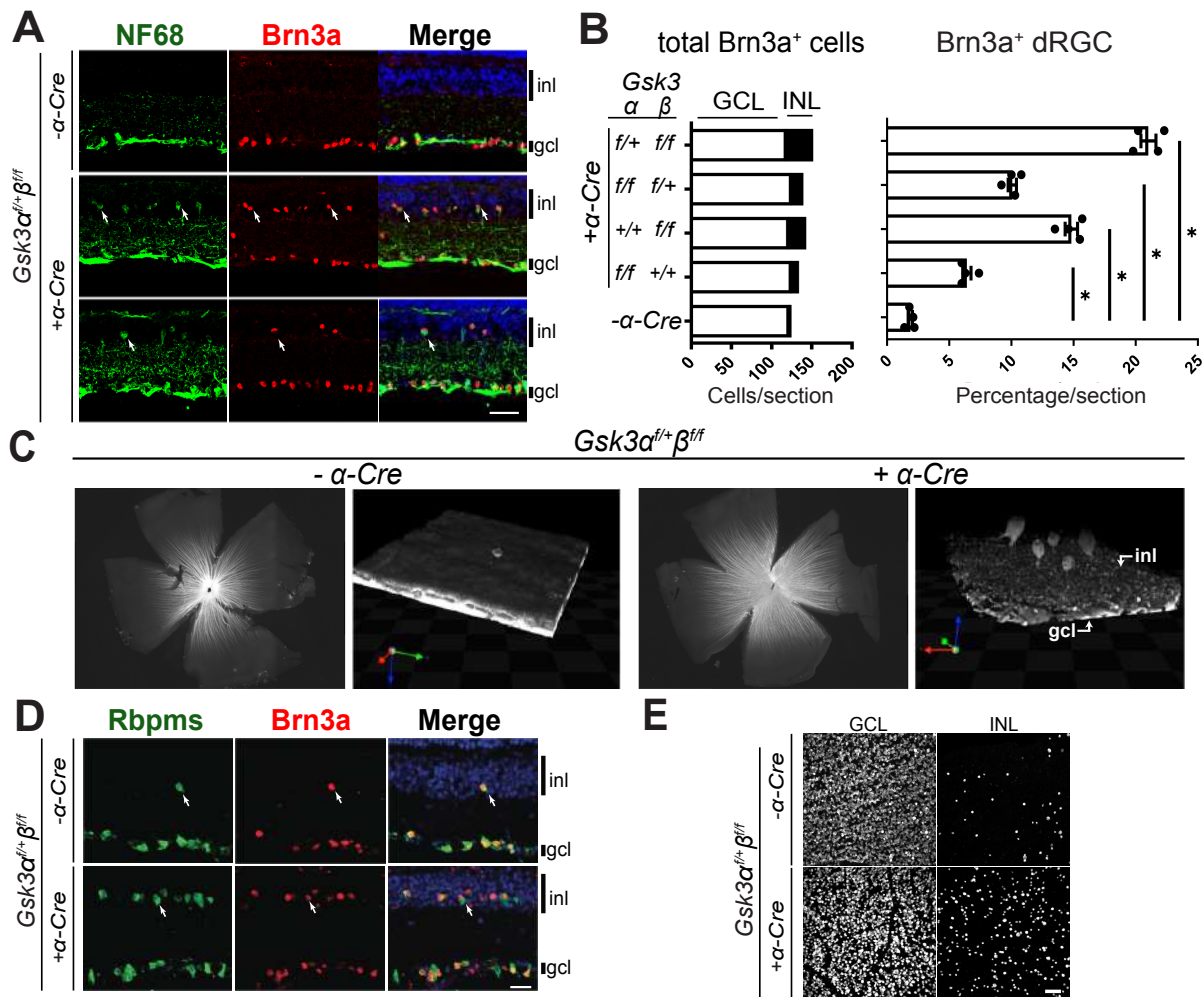

903  
904

905 **Figure 4. Gradual loss of *Gsk3α* and/or *Gsk3β* leads to an increased number of**  
 906 **Brn3a-positive retinal ganglion cells displaced in the inner nuclear layer (INL) of**  
 907 **adult retina. (A) Brn3a (red) and NF68 (green) IHC on 2-month-old *Gsk3α<sup>f/+</sup>β<sup>f/f</sup>; α-Cre***  
 908 **mouse retina reveals the presence of supernumerary displaced retinal ganglion cells**  
 909 **(dRGCs, arrows) in the INL of *Gsk3α<sup>f/+</sup>β<sup>f/f</sup>; α-Cre* compared to littermate controls. Top**  
 910 **panel represents control retinas, middle panel a peripheral retinal area, and bottom**  
 911 **panel a more central area. Scale bar: 20 μm. (B) Gradual loss of *Gsk3α* and *Gsk3β***  
 912 **alleles (*Gsk3α<sup>f/f</sup>β<sup>+/+</sup>*, *Gsk3α<sup>+/+</sup>β<sup>f/f</sup>*, *Gsk3α<sup>f/+</sup>β<sup>f/f</sup>* or *Gsk3α<sup>f/f</sup>β<sup>+/+</sup>*) leads to a gradual increase**  
 913 **of Brn3a-positive RGCs located to the INL, with the highest number observed in**  
 914 ***Gsk3α<sup>f/+</sup>β<sup>f/f</sup>; α-Cre* animals. Left stacked histogram represents counting of the total**  
 915 **number of Brn3a-positive cells per section located in the GCL (white bars) and in the**  
 916 **INL (black bars). Right histogram represents the percentage of the dRGCs among the**  
 917 **total number of Brn3a-positive cells per section for each combination. Mean ± SEM**  
 918 **values are presented from 4 biological replicates, \* indicates  $P \leq 0.05$ . (C) dRGCs send**  
 919 **their axons into the optic nerve. Visualization of dRGCs after 3D reconstruction of 2-**  
 920 **month-old flat mounted retina of control and *Gsk3α<sup>f/+</sup>β<sup>f/f</sup>; α-Cre* animals following**  
 921 **retrograde labeling with Rhodamin-Dextran applied onto the optic nerve. inl: inner**  
 922 **nuclear layer, gcl: ganglion cell layer. (D) Brn3a (red) and Rbpms (green) IHC on 2-**  
 923 **month-old mouse retina reveal the co-expression of these two RGC markers (dRGCs,**  
 924 **arrows) in the INL of both *Gsk3α<sup>f/+</sup>β<sup>f/f</sup>; α-Cre* dRGCs and in littermate controls. Scale**



925 bar: 20  $\mu\text{m}$ . (E) Flat mounted retina from  $Gsk3\alpha^{fl/+}\beta^{fl/fl}$ ;  $\alpha\text{-Cre}$  and littermate controls  
926 labelled with anti-Rbpms antibody demonstrated the large number of Rbpms-positive  
927 dRGCs in the INL of  $Gsk3\alpha^{fl/+}\beta^{fl/fl}$ ;  $\alpha\text{-Cre}$  mice.

928  
929  
930  
931  
932  
933  
934  
935  
936  
937  
938  
939  
940  
941  
942  
943  
944  
945  
946  
947  
948  
949  
950  
951  
952  
953  
954  
955  
956  
957  
958  
959  
960  
961  
962  
963  
964  
965  
966  
967  
968  
969

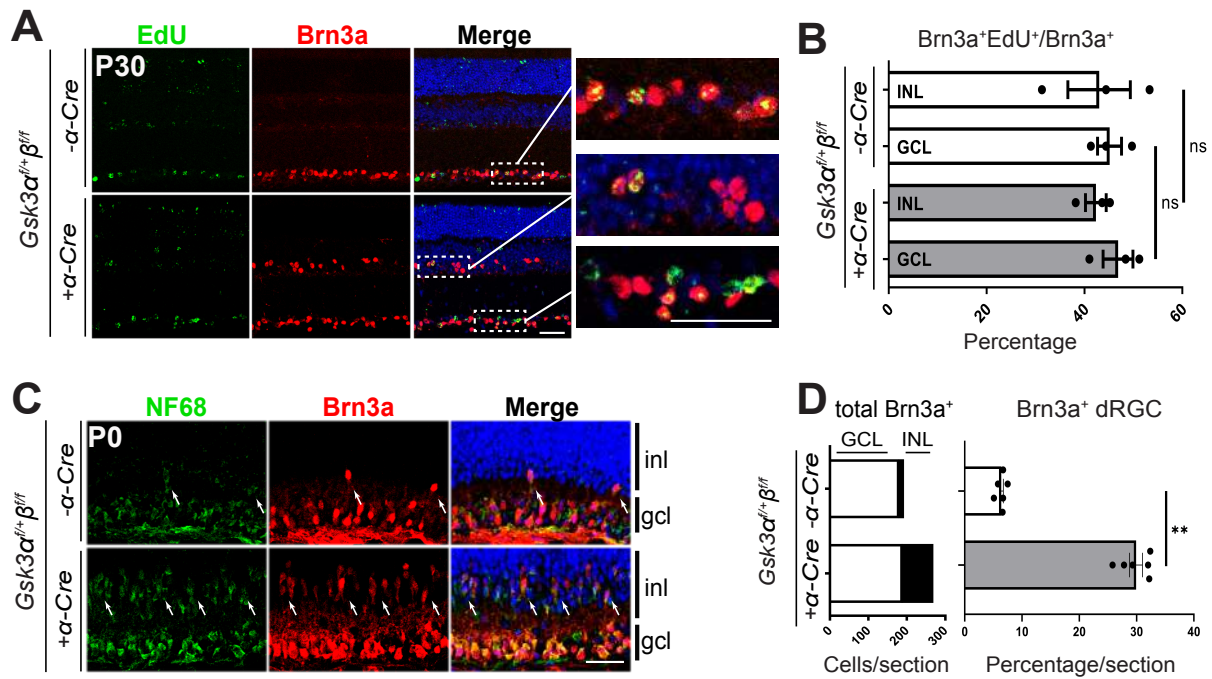

970  
971

972 **Figure 5. dRGCs are produced in the same differentiation wave as oRGC located**  
 973 **in the GCL.** (A) EdU- (green) and Brn3a-positive cells (red) were found both in the  
 974 GCL and in the INL of 30-days old  $Gsk3\alpha^{f/+}\beta^{ff}; \alpha-Cre$  animals after a single injection of  
 975 EdU at E12.5. (B) Percentage of EdU- and Brn3a-positive cells located either in the  
 976 GCL or in the INL among total number of Brn3a-positive cells. Mean  $\pm$  SEM values are  
 977 presented from 3-4 biological replicates, ns: not significant (C) Brn3a (red) and NF68  
 978 (green) immunostaining on P0 mouse retina revealed that a large number of dRGCs  
 979 were already present in  $Gsk3\alpha^{f/+}\beta^{ff}; \alpha-Cre$  but they were fewer in littermate controls  
 980 (white arrows). (D) Left stacked histogram represents counting of the total number of  
 981 Brn3a-positive cells per section located in the GCL (white bars) and in the INL (black  
 982 bars) of  $Gsk3\alpha^{f/+}\beta^{ff}; \alpha-Cre$  retina. Right histogram represents the percentage of the  
 983 dRGCs among the total number of Brn3a-positive cells per section. Mean  $\pm$  SEM  
 984 values are presented from 6 biological replicates, \*\* indicates  $P \leq 0.01$ . inl, inner  
 985 nuclear layer; gcl, ganglion cell layer. Scale bar: 20 $\mu$ m.

986  
987  
988  
989  
990  
991  
992  
993  
994  
995  
996  
997  
998

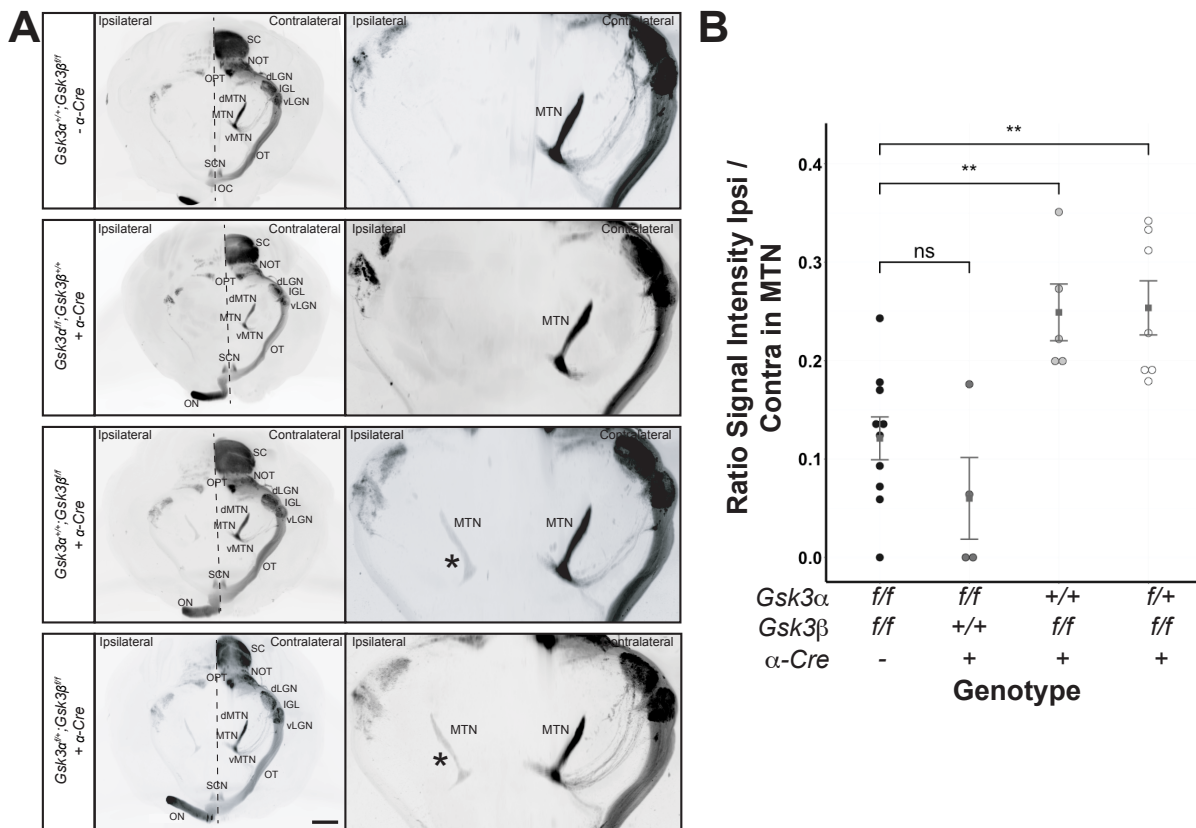

999  
1000

1001 **Figure 6. Lack of *Gsk3β* results in RGC projections into the ipsilateral Medial**  
 1002 **Terminal Nucleus.** (A) All panels are light sheet fluorescence microscopy of solvent-  
 1003 cleared adult brain from control, *Gsk3α<sup>f/f</sup>β<sup>+/+</sup>; α-Cre*, *Gsk3α<sup>+/+</sup>β<sup>f/f</sup>; α-Cre* and *Gsk3α<sup>f/+</sup>β<sup>f/f</sup>; α-Cre*  
 1004 *α-Cre* animals after intravitreal injection of CTB coupled to either an Alexa-555 or -647.  
 1005 Ipsilateral projections of RGCs into the MTN was observed in the absence of *Gsk3β*  
 1006 expression. SC, superior colliculus; NOT, nucleus of optic tract; dLGN, dorsal lateral  
 1007 geniculate nucleus; vLGN, ventral lateral geniculate nucleus; IGL, intergeniculate  
 1008 leaflet; OPT, Olivary Pretectal Nucleus; dMTN, dorsal medial terminal nucleus; MTN,  
 1009 medial terminal nucleus; vMTN, ventral medial terminal nucleus; OT, Optic tract; SCN,  
 1010 suprachiasmatic nucleus; ON, optic nerve. Scale bar: 1mm; \* indicates the ipsilateral  
 1011 MTN. (B) Quantification of the signal intensity ratio between ipsilateral and  
 1012 contralateral MTN in controls and *Gsk3* mutants (including *Gsk3α<sup>f/f</sup>β<sup>+/+</sup>; α-Cre*,  
 1013 *Gsk3α<sup>+/+</sup>β<sup>f/f</sup>; α-Cre*, and *Gsk3α<sup>f/+</sup>β<sup>f/f</sup>; α-Cre*). ns: non-significant, \*\*  $P \leq 0.01$ .

1014  
1015  
1016  
1017  
1018  
1019  
1020  
1021  
1022  
1023  
1024

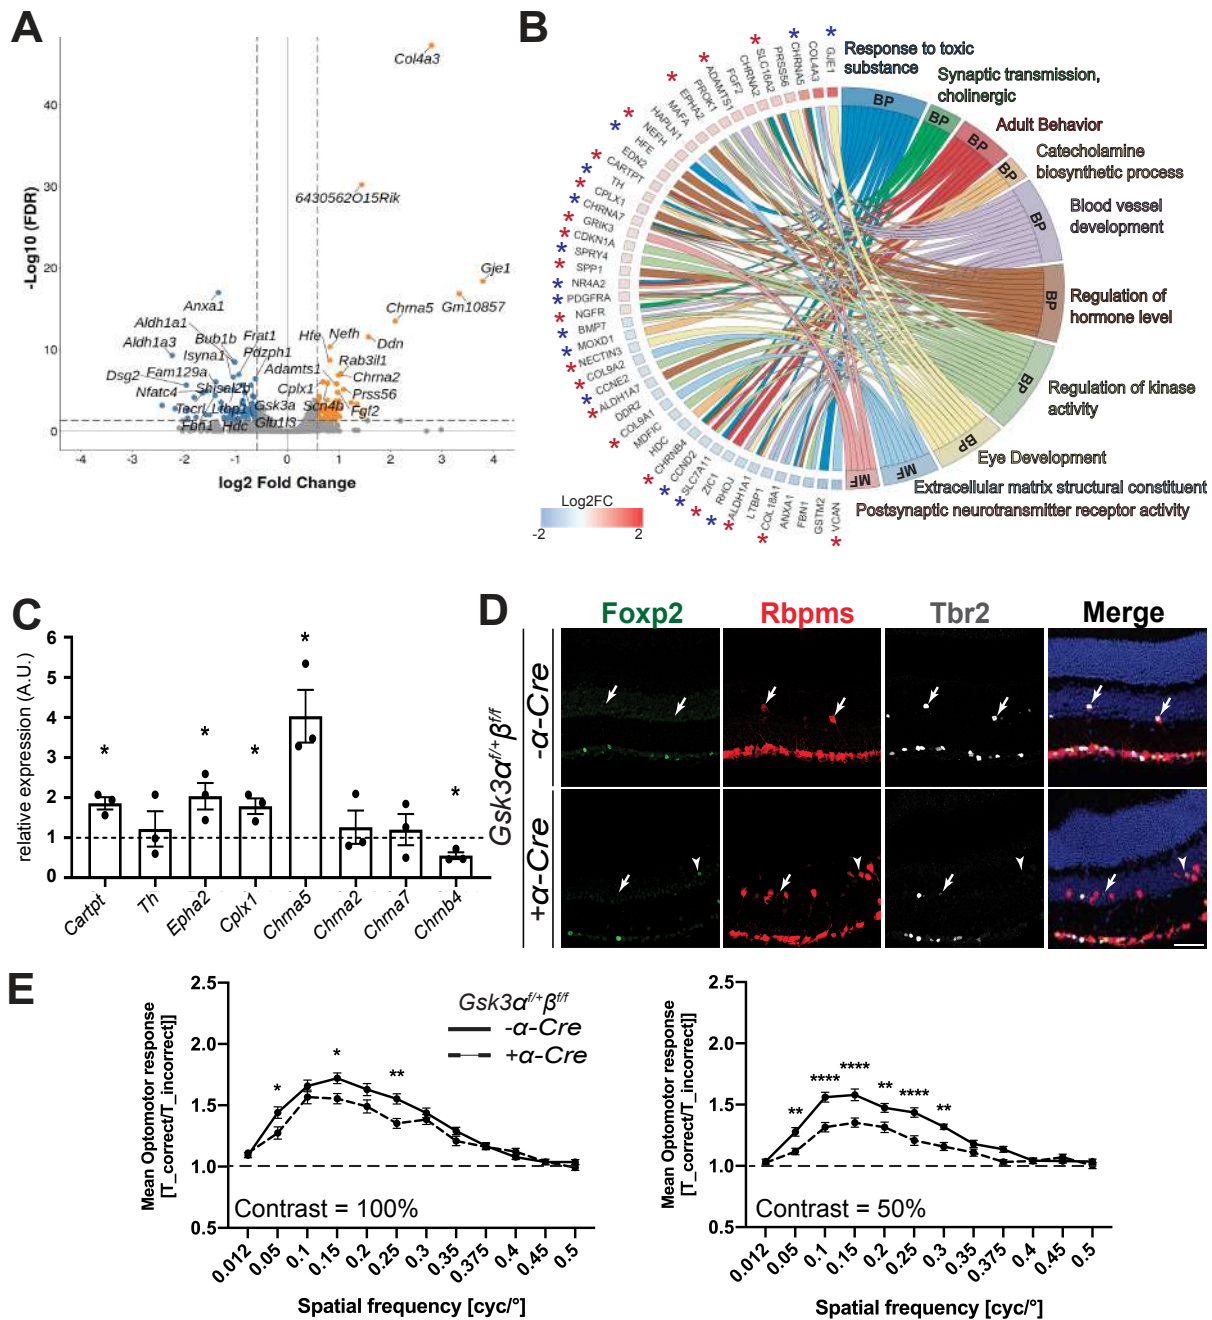

1025

1026

1027

1028

1029

1030

1031

1032

1033

1034

1035

1036

1037

1038

**Figure 7. dRGC characterization in  $Gsk3\alpha^{f/+}\beta^{f/f}; \alpha\text{-Cre}$  retina.** (A) Volcano plot representation of differentially expressed genes between  $Gsk3\alpha^{f/+}\beta^{f/f}; \alpha\text{-Cre}$  and control retina plotted on the x-axis ( $\log_2$  scale). FDR adjusted significance is plotted on the y-axis. Orange and blue dots: significantly up-regulated and down-regulated genes in  $Gsk3\alpha^{f/+}\beta^{f/f}; \alpha\text{-Cre}$  retina, respectively. Vertical dashed lines represent  $FC=1.5$ . Horizontal dashed line represents  $FDR=0.05$ . (B) Chord plot representation of DEGs related to GO annotations belonging to either molecular functions (MF) or biological process (BP). Overlaps in GO annotation amongst genes within each category are visualized. \* correspond to genes expressed in previously published purified RGCs (blue, slightly expressed genes in RGCs between 1 and 5 FPKM; red, highly expressed genes in RGCs more than 5 FPKM). (C) RT-qPCR validation of selected DEGs identified by RNA-seq analysis. Differential expression analysis by RT-

1039 qPCR of *Cartpt*, *Th*, *Epha2*, *Cplx1*, *Chrna5*, *Chrna2*, *Chrna7*, *Chrn4* in *Gsk3 $\alpha$ <sup>fl/+</sup> $\beta$ <sup>fl/fl</sup>;  $\alpha$ -*  
1040 *Cre* retina at 2-months of age, relative to littermate control retina levels. All values are  
1041 expressed as the Mean  $\pm$  SEM from three biological replicates. \* indicates  $P \leq 0.05$ .  
1042 (D) IHC on 2-month-old mouse retina reveals the presence of a subset of dRGCs  
1043 (Rbpms-positive dRGCs, red) in *Gsk3 $\alpha$ <sup>fl/+</sup> $\beta$ <sup>fl/fl</sup>;  $\alpha$ -*Cre* expressing either the transcription  
1044 factor *Tbr2* (grey) or *Foxp2* (green). Arrows indicate *Tbr2* and Rbpms-positive dRGCs;  
1045 arrowheads represent *Foxp2* and Rbpms-positive dRGCs. Scale bar: 50  $\mu$ m. (E) The  
1046 mean OMR indices ( $\pm$ SEM) are plotted as a function of spatial frequency for each  
1047 genotype (n=13 for *Gsk3 $\alpha$ <sup>fl/+</sup> $\beta$ <sup>fl/fl</sup> and 18 for *Gsk3 $\alpha$ <sup>fl/+</sup> $\beta$ <sup>fl/fl</sup>;  $\alpha$ -*Cre* genotype). The baseline  
1048 (1; dashed line) represents unspecific head movements and no response to the  
1049 stimulus. OMR at 100% and 50% contrast in *Gsk3 $\alpha$ <sup>fl/+</sup> $\beta$ <sup>fl/fl</sup>;  $\alpha$ -*Cre* mice (dashed line) and  
1050 controls (black line). \* indicates  $P \leq 0.05$ , \*\* indicates  $P \leq 0.01$ , \*\*\* indicates  $P \leq 0.001$ .  
1051  
1052  
1053****



1054 SUPPLEMENTARY FIGURE LEGENDS

1055

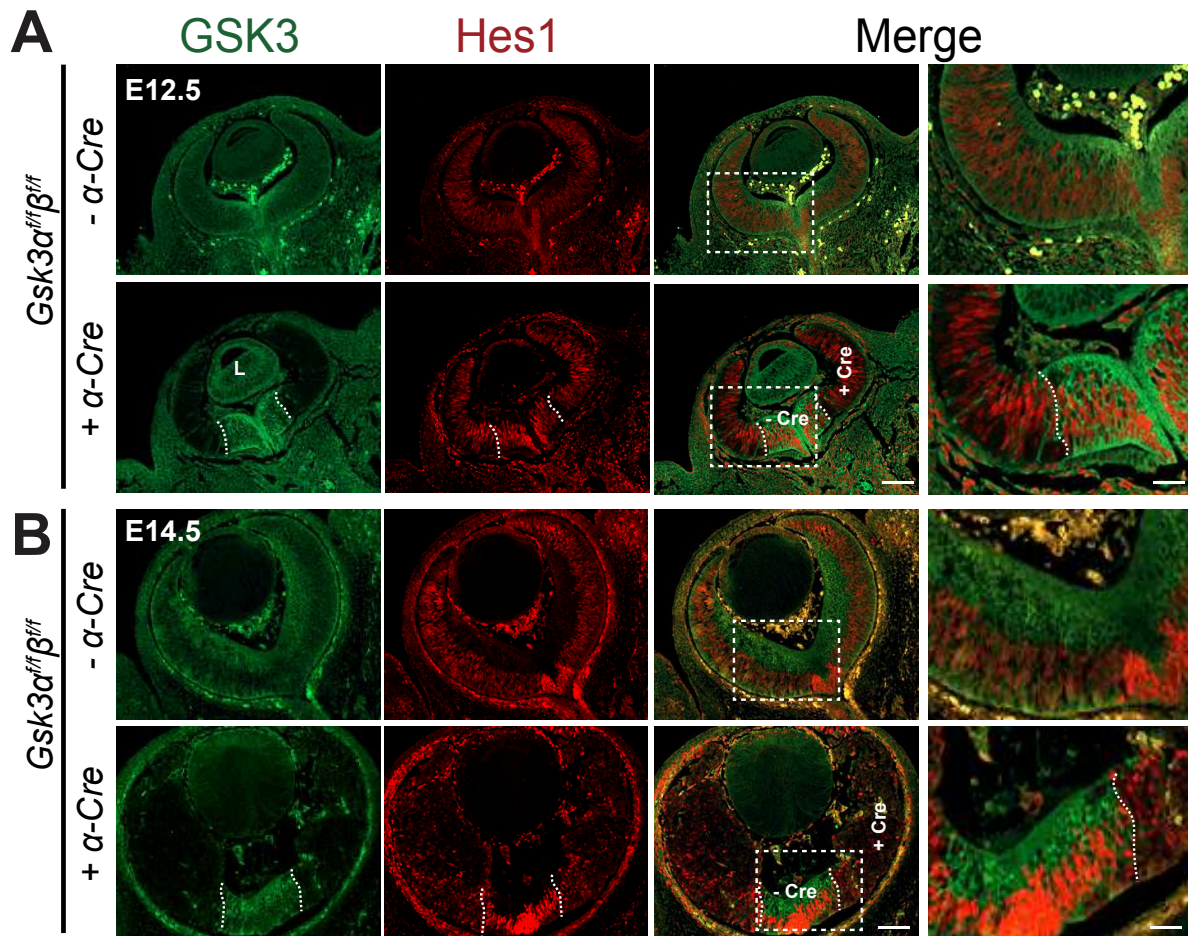

1056

1057

1058 **Supplementary data 1. Lack of *Gsk3α* and *Gsk3β* expression impairs the**  
1059 **maintenance of the pool of retinal progenitors.** IHC on E12.5 and E14.5  $Gsk3\alpha^{ff/\beta^{ff}}$   
1060 and  $Gsk3\alpha^{ff/\beta^{ff}};\alpha$ -Cre retina using Hes1 (red) and pan-GSK3 (green) indicates a loss  
1061 of retinal progenitors at E14.5. Magnification on the right panel shows the squared  
1062 delimited area. Dashed lines delimit the central *Gsk3*-expressing area and the *Gsk3*-  
1063 deleted area at the periphery Scale bar: 100  $\mu$ m, magnification area scale bar 40  $\mu$ m.

1064

1065

1066

1067

1068

1069

1070

1071

1072

1073

1074

1075

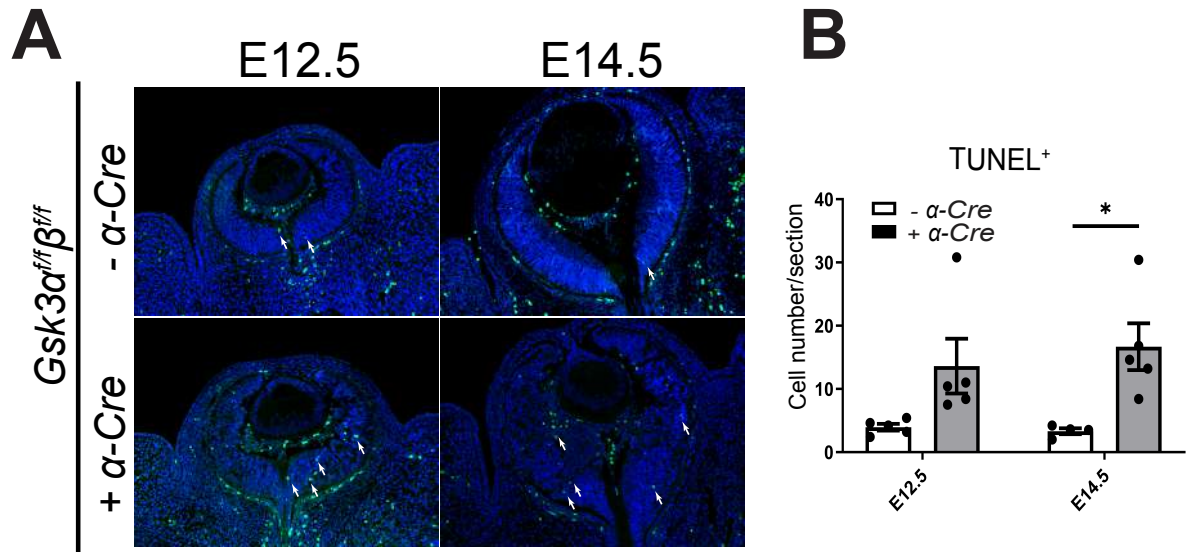

1076  
1077

1078 **Supplementary data 2. Lack of *Gsk3 $\alpha$*  and *Gsk3 $\beta$*  expression in retinal**  
1079 **progenitors leads to increased cell death.** (A) TUNEL assay on E12.5 and E14.5  
1080 *Gsk3 $\alpha^{ff/ff}$  $\beta^{ff/ff}$ ;  $\alpha$ -Cre* and control animals reveals an increase of cell death (TUNEL-  
1081 positive cells, green) in *Gsk3 $\alpha^{ff/ff}$  $\beta^{ff/ff}$ ;  $\alpha$ -Cre* animals compared to littermate controls. (B)  
1082 Quantification of the number of TUNEL-positive cells per retinal section. Mean  $\pm$  SEM  
1083 values are presented from 5 to 6 biological replicates for E12.5, 4-5 biological  
1084 replicates for E14.5, \* indicates  $P \leq 0.05$ .

1085  
1086  
1087  
1088  
1089  
1090  
1091  
1092  
1093  
1094  
1095  
1096  
1097  
1098  
1099  
1100  
1101  
1102  
1103  
1104  
1105  
1106

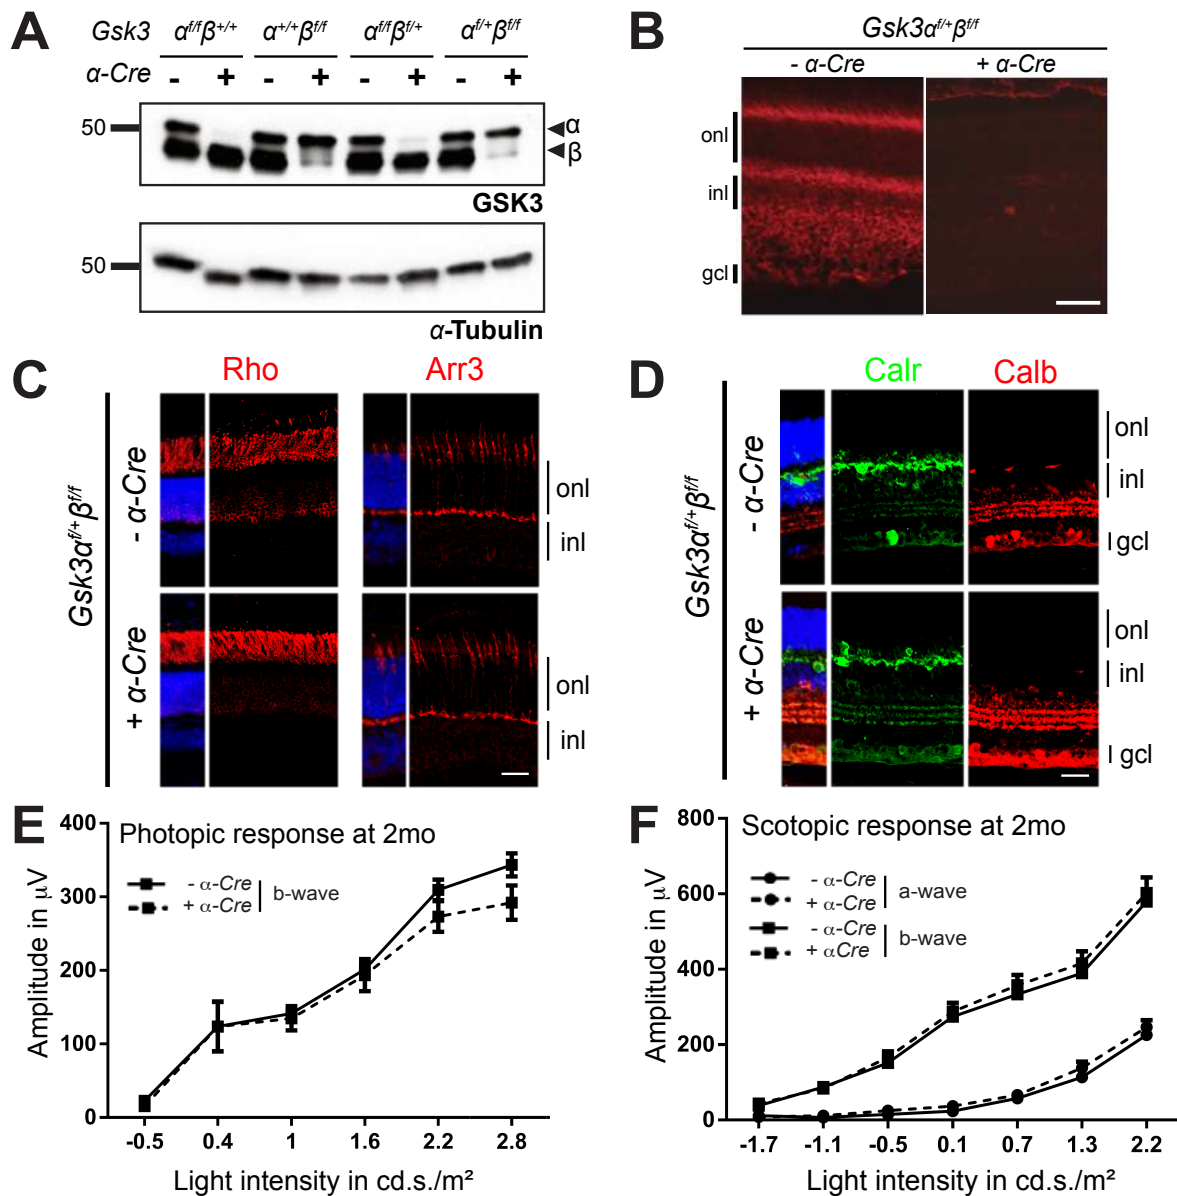

1107  
1108

1109 **Supplementary data 3. One allele of either *Gsk3α* or *Gsk3β* is sufficient for the**  
 1110 **development of a functional retina.** (A) Immunoblot analysis of protein extracts from  
 1111 2-month-old animals with different combination of *Gsk3α* and *Gsk3β* floxed alleles  
 1112 (*Gsk3α<sup>fl/fl</sup>β<sup>+/+</sup>*, *Gsk3α<sup>+/+</sup>β<sup>fl/fl</sup>*, *Gsk3α<sup>fl/+</sup>β<sup>fl/fl</sup>* or *Gsk3α<sup>fl/fl</sup>β<sup>fl/+</sup>*) with or without *Cre* recombinase  
 1113 using anti-panGSK3 antibody (recognizing both isoforms) reveals decreased  
 1114 expression of GSK3α or GSK3β (arrowheads).  $\alpha$ -Tubulin is used as loading control.  
 1115 (B) IHC on 2-month-old retinal sections from control and *Gsk3α<sup>fl/+</sup>β<sup>fl/fl</sup>*,  $\alpha$ -*Cre* retinas with  
 1116 or without *Cre* recombinase using anti-GSK3β antibody (red) showing ubiquitous  
 1117 *Gsk3β* expression in all retinal layers, whereas its expression is lost in the *Cre*-  
 1118 expressing retina. (C) Expression of only one *Gsk3* allele (*Gsk3α*) is sufficient for  
 1119 proper photoreceptor development. IHC using anti-Rhodopsin (Rho, red) and anti-  
 1120 Cone arrestin (Arr3, red) antibodies to label rod and cone photoreceptors, respectively.  
 1121 (D) Expression of only one *Gsk3* allele (*Gsk3α*) is sufficient for proper interneuron  
 1122 development. IHC using anti-Calretinin (Calr, green) and anti-Calbindin (Calb, red)

1123 antibodies to label horizontal and amacrine cells, respectively. (B-D) onl, outer nuclear  
1124 layer; inl, inner nuclear layer; gcl, ganglion cell layer. Scale bar: 20 $\mu$ m. (E, F)  
1125 Electroretinogram (ERG) recording in 2-month-old *Gsk3 $\alpha^{f/+}\beta^{f/f};\alpha$* -Cre animals and  
1126 littermate controls. Photopic (cones) (E) and scotopic (rods) (F) response in  
1127 *Gsk3 $\alpha^{f/+}\beta^{f/f};\alpha$* -Cre animals are similar to controls. Mean  $\pm$  SEM intensity response  
1128 curves of a- and b-wave responses averaged from 8 biological replicates of each  
1129 genotype.

1130  
1131  
1132  
1133  
1134  
1135  
1136  
1137  
1138  
1139  
1140  
1141  
1142  
1143  
1144  
1145  
1146  
1147  
1148  
1149  
1150  
1151  
1152  
1153  
1154  
1155  
1156  
1157  
1158  
1159  
1160  
1161  
1162  
1163  
1164  
1165  
1166  
1167



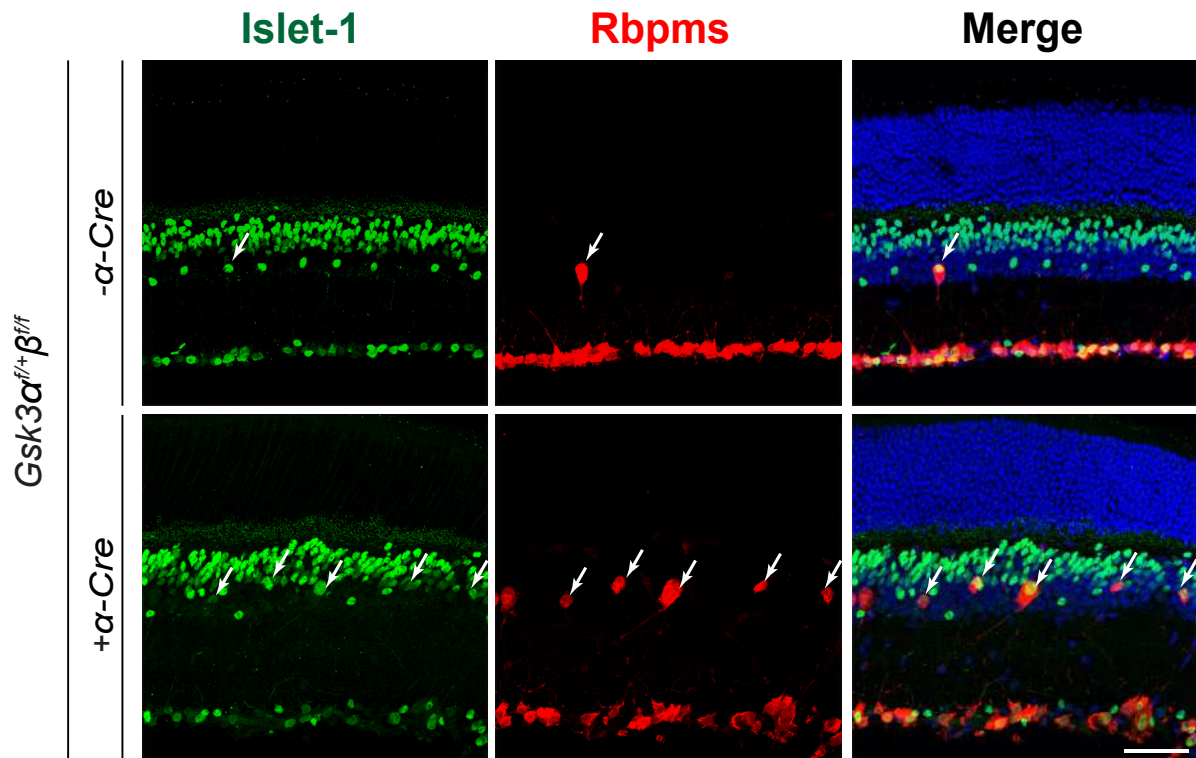

1168

1169

1170

**Supplementary data 4. dRGCs express the nuclear factor Islet-1.** IHC on 2-month-old mouse retina reveals that most dRGCs (Rbpms-positive dRGCs, white arrows, red) in the INL of  $Gsk3\alpha^{fl/+}\beta^{fl/fl}; \alpha-Cre$  and littermate controls were positive for Islet-1 (green), a marker expressed in the nuclei of ganglion cells, and of cholinergic amacrine cells, ON-bipolar cells, and subpopulations of horizontal cells. Scale bar: 50  $\mu$ m.

1175

1176

1177

1178

1179

1180

1181

1182

1183

1184

1185

1186

1187

1188

1189

1190

1191

1192

1193

1194



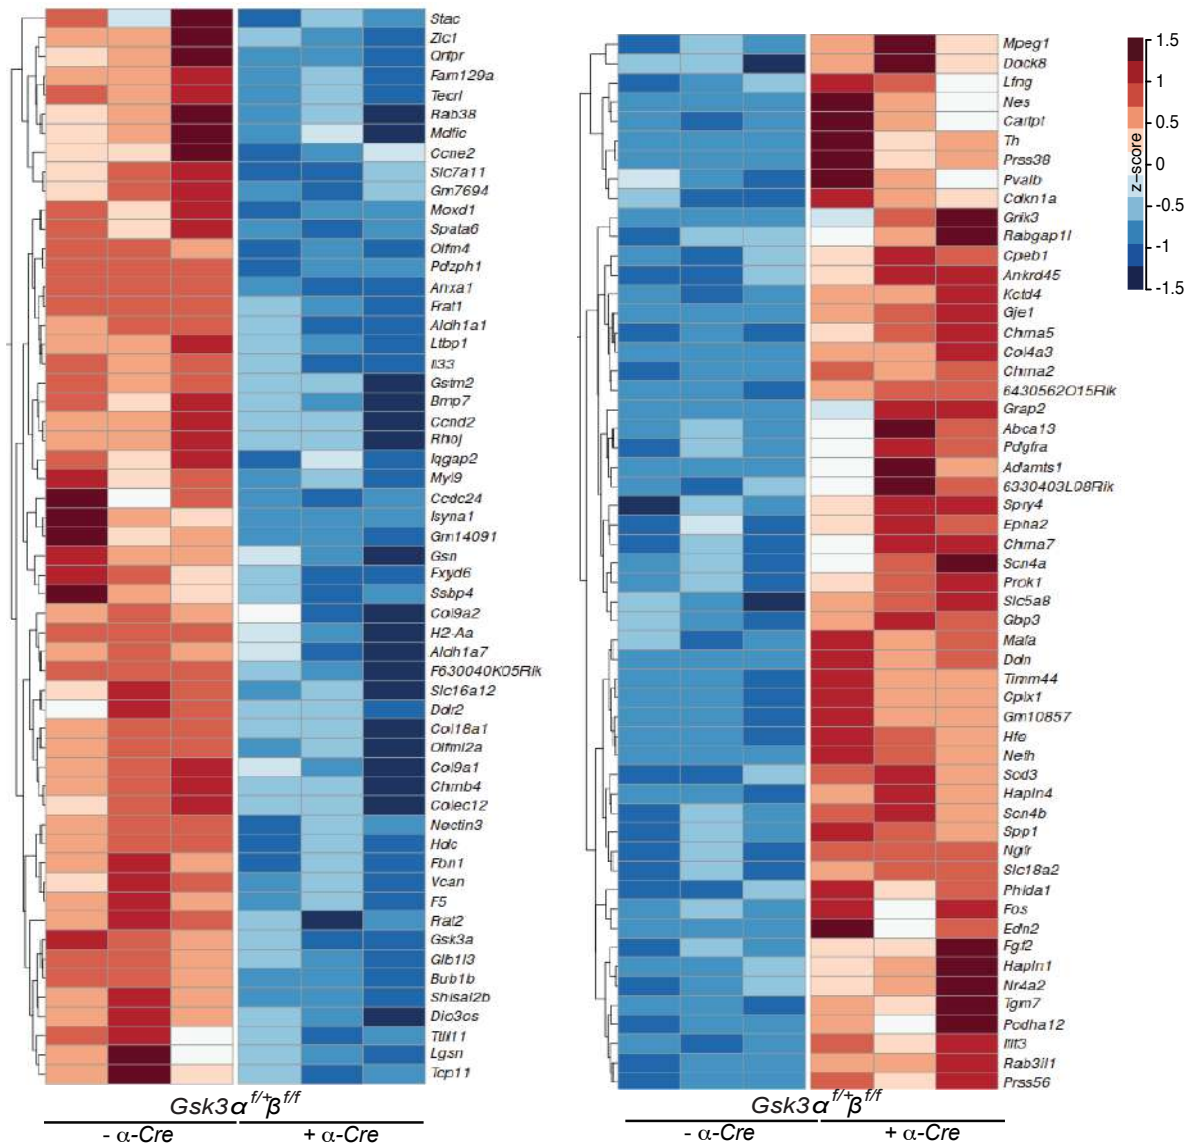

1195

1196

1197

1198

1199

1200

1201

1202

1203

1204

1205

1206

1207

1208

1209

1210

1211

1212

**Supplementary data 5. Hierarchical clustering of the identified differentially expressed genes.** Hierarchical clustering representing the 111 DEGs ( $\text{abs(FC)} \geq 1.5$ ;  $\text{FDR} \leq 0.05$ ;  $\text{FPKM} > 1$ ) between 2-month-old *Gsk3α<sup>f/+</sup>β<sup>ff</sup>*; *α-Cre* retina and littermate control were clustered by their Z-score. Left panel corresponds to downregulated genes; Right panel corresponds to upregulated genes.

**A**

| Category | ID            | Term                                            | Count | List Total | Genes                                                                                            | FDR      |
|----------|---------------|-------------------------------------------------|-------|------------|--------------------------------------------------------------------------------------------------|----------|
| BP       | GO:0009636    | response to toxic substance                     | 12    | 354        | Chrna7, Aldh1a1, Gstm2, Anxa1, Nr4a2, Th, Slc7a11, Chrb4, Chrna5, Chrna2, Slc18a2, Nefh          | 1.72E-03 |
| BP       | GO:0007271    | synaptic transmission, cholinergic              | 5     | 34         | Chrna7, Ngfr, Chrb4, Chrna5, Chrna2                                                              | 2.38E-03 |
| BP       | GO:0030534    | adult behavior                                  | 8     | 193        | Chrna7, Ccnd2, Nr4a2, Zic1, Slc7a11, Cartpt, Chrb4, Chrna5                                       | 9.01E-03 |
| BP       | GO:0042423    | catecholamine biosynthetic process              | 4     | 26         | Hdc, Nr4a2, Th, Moxd1                                                                            | 1.03E-02 |
| BP       | GO:0010817    | regulation of hormone levels                    | 12    | 574        | Chrna7, Aldh1a1, Cplx1, Edn2, Hfe, Anxa1, Pdgfra, Spp1, Aldh1a7, Cartpt, Slc18a2, Mafa           | 2.18E-02 |
| BP       | GO:0043549    | regulation of kinase activity                   | 14    | 774        | Chrna7, Bmp7, Ccnd2, Ccne2, Cdkn1a, Epha2, Fbn1, Fgf2, Mdfic, Ddr2, Pdgfra, Spry4, Cartpt, Prok1 | 2.18E-02 |
| BP       | GO:0001654    | eye development                                 | 10    | 402        | Aldh1a1, Bmp7, Epha2, Fgf2, Pdgfra, Th, Nectin3, Prss56, Gje1, Rhoj                              | 2.26E-02 |
| BP       | GO:0001568    | blood vessel development                        | 13    | 731        | Chrna7, Adams1, Bmp7, Col18a1, Col4a3, Epha2, Fgf2, Anxa1, Ngfr, Pdgfra, Rhoj, Prok1, Ltbp1      | 3.46E-02 |
| KEGG     | mmu04151      | PI3K-Akt signaling pathway                      | 11    | 346        | Ccnd2, Ccne2, Cdkn1a, Col4a3, Col9a1, Col9a2, Epha2, Fgf2, Ngfr, Pdgfra, Spp1                    | 2.69E-03 |
| MF       | GO:0005201    | extracellular matrix structural constituent     | 8     | 143        | Col18a1, Col4a3, Col9a1, Col9a2, Hapln1, Vcan, Fbn1, Ltbp1                                       | 2.38E-03 |
| MF       | GO:0098960    | postsynaptic neurotransmitter receptor activity | 5     | 58         | Chrna7, Grik3, Chrb4, Chrna5, Chrna2                                                             | 1.03E-02 |
| RGS      | R-MMU-622327  | Postsynaptic nicotinic acetylcholine receptors  | 4     | 13         | Chrna7, Chrb4, Chrna5, Chrna2                                                                    | 2.08E-03 |
| RGS      | R-MMU-1474244 | Extracellular matrix organization               | 10    | 266        | Bmp7, Col18a1, Col4a3, Col9a1, Hapln1, Fbn1, Fgf2, Ddr2, Spp1, Ltbp1                             | 2.38E-03 |
| TRRUST   | TRR00919      | Regulated by: Egr1                              | 5     | 71         | Chrna7, Ccnd2, Fgf2, Ngfr, Th                                                                    | 2.18E-02 |
| TRRUST   | TRR00820      | Regulated by: Atf4                              | 3     | 13         | Cdkn1a, Fgf2, Ddr2                                                                               | 2.26E-02 |
| TRRUST   | TRR01387      | Regulated by: Rbpj                              | 3     | 18         | Cdkn1a, Fos, Lfng                                                                                | 4.45E-02 |

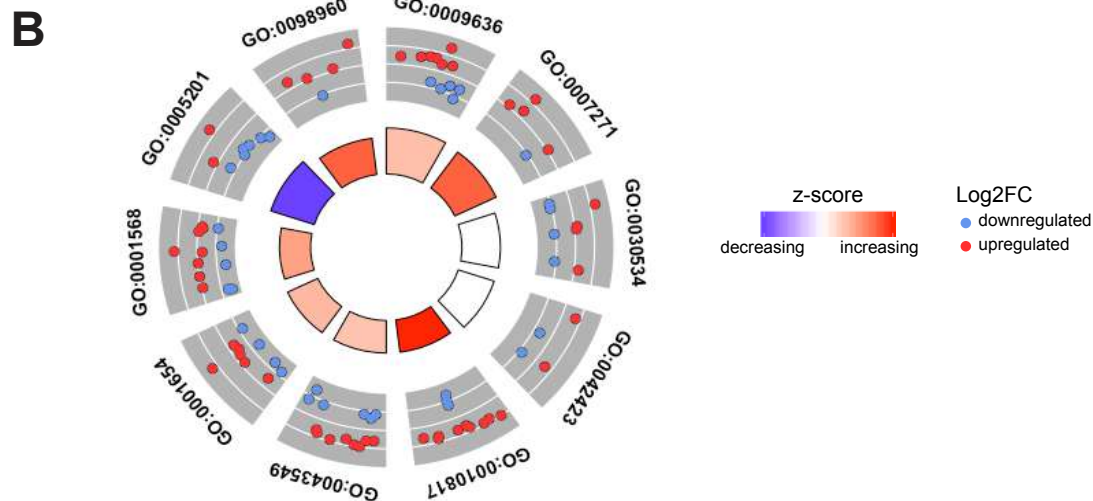

1213  
1214

1215 **Supplementary data 6. Identification of enriched pathways from DEGs identified**  
 1216 **in 2-month-old *Gsk3a<sup>fl/+</sup>β<sup>fl/fl</sup>; α-Cre* retina.** (A) Gene ontology (GO) annotations of  
 1217 DEGs in *Gsk3a<sup>fl/+</sup>β<sup>fl/fl</sup>; α-Cre* retina compared to littermate controls. Top over-  
 1218 represented pathways for Biological process (BP), Molecular Function (MF), KEGG  
 1219 (Kyoto Encyclopedia of Genes and Genomes) and TRRUST (Transcriptional  
 1220 Regulatory Relationships Unrevealed by Sentence-based Text mining) were identified  
 1221 by enrichment analysis using Metascape. (B) Circular visualization for BP and MF of  
 1222 GO enrichment analysis. Down-regulated genes (blue dots) and up-regulated genes  
 1223 (red dots) within each GO pathway are plotted based on logFC. Z-score bars indicate  
 1224 if an entire GO category is more likely to be increased or decreased based on the  
 1225 genes within it.

1226  
1227  
1228  
1229  
1230  
1231  
1232

1233 **Supplementary Table 1. List of primary and secondary antibodies used for**  
 1234 **immunohistochemistry (IF) and western blot (WB)**

1235  
 1236 **Primary antibodies**

| ANTIGENE                | HOST   | SUPPLIER                 | REFERENCE  | DILUTION (IF) | DILUTION (WB) |
|-------------------------|--------|--------------------------|------------|---------------|---------------|
| $\alpha$ -tubulin       | mouse  | SIGMA                    | T5168      |               | 1:200.000     |
| GSK3 $\alpha$ / $\beta$ | mouse  | Thermo Fisher Scientific | 44-610     | 1:250         | 1:1000        |
| GSK3 $\beta$            | mouse  | BD                       | 610201     | 1:250         |               |
| $\beta$ -catenin        | rabbit | Abcam                    | ab2365     | 1:200         |               |
| HES1                    | rabbit | Cell Signaling           | 11988S     | 1:200         |               |
| Brn3a                   | mouse  | Santa Cruz               | sc-8429    | 1:200         |               |
| GFP                     | goat   | Abcam                    | ab290-50   | 1:500         |               |
| pH3                     | rabbit | EMD Millipore            | 06-570     | 1:300         |               |
| Calbindin D-28k         | rabbit | Swant                    | 300        | 1:100         |               |
| Calretinin              | mouse  | EMD Millipore            | MAB1568    | 1:1000        |               |
| Cone Arrestin           | rabbit | EMD Millipore            | AB15282    | 1:1000        |               |
| Rhodopsin               | Mouse  | Abcam                    | MAB5316    | 1:2000        |               |
| Tbr2                    | Rat    | Ebioscience              | 14-4876    | 1 :300        |               |
| Foxp2                   | Goat   | Santa Cruz               | sc-21069   | 1 :1000       |               |
| Rbpms                   | Rabbit | PhosphoSolutions         | 1830-RBPMS | 1 :400        |               |

1237 **Secondary antibodies**

| ANTIGENE                         | HOST   | SUPPLIER                 | REFERENCE | DILUTION (IF) | DILUTION (WB) |
|----------------------------------|--------|--------------------------|-----------|---------------|---------------|
| Alexa Fluor 555 anti-mouse IgG2A | goat   | Thermo Fisher Scientific | A21127    | 1:1000        |               |
| Alexa Fluor 555 anti-mouse IgG2B | goat   | Thermo Fisher Scientific | A21147    | 1:1000        |               |
| Alexa Fluor 488 anti-rabbit      | donkey | Thermo Fisher Scientific | A21206    | 1:1000        |               |
| Alexa Fluor 488 anti-mouse IgG1  | goat   | Thermo Fisher Scientific | A21240    | 1:1000        |               |
| Alexa Fluor 488 anti-rabbit      | goat   | Thermo Fisher Scientific | A21244    | 1:1000        |               |
| HRP anti-mouse IgG               | goat   | Sigma-Aldrich            | A4416     |               | 1:5000        |

1238  
 1239

1240 **Supplementary Table 2. List of primers used for RT-qPCR**

| <b>Gene name</b> | <b>Primer F</b>       | <b>Primer R</b>       |
|------------------|-----------------------|-----------------------|
| <i>Cartpt</i>    | TAAAGTTTTCGTTCCCTCAG  | CAACACCATTCGAGGCATTCT |
| <i>Th</i>        | ACTATGCCTCTCGTATCCAGC | CGGATGGTGTGAGGACTGTC  |
| <i>Epha2</i>     | GACCTCCCCATCTTCATTTGG | GCGTACAGTGCCCTAGTCATA |
| <i>Cplx1</i>     | GGTGATGAGGAAAAGGACCCC | TCTTGCGTACTTTGCTTTGC  |
| <i>Chrna5</i>    | CTTGAGTACCAACACTGTCCG | CCAGTACTCCAAGATGCCCT  |
| <i>Chrna2</i>    | CATTATCGTCTGCTTCCTGGG | CTTGGAGCCAACATGAGGGA  |
| <i>Chrna7</i>    | CTGTAGCTGTCGGTCTTGAGA | CAATGATATGCCGGTGATGGG |
| <i>Chrb4</i>     | AAACTGATCTGGCTACCTCCC | GTAGAGAGTCCAGGAGATGCC |

1241
